1 ***Staphylococcus aureus* toxin LukSF dissociates from its membrane receptor target to enable**  
2 **renewed ligand sequestration**

3

4 **Authors:**

5 Karita Haapasalo<sup>1, 2, 4</sup>, Adam J. M. Wollman<sup>3, 4</sup>, Carla de Haas<sup>1</sup>, Kok van Kessel<sup>1</sup>, Jos van Strijp<sup>1</sup>, Mark  
6 C. Leake<sup>3, 5, \*</sup>

7 <sup>1</sup> Department of Medical Microbiology, University Medical Center Utrecht, Utrecht University,  
8 Utrecht, The Netherlands

9 <sup>2</sup> Department of Bacteriology and Immunology, and Research Programs Unit, Immunobiology,  
10 University of Helsinki, Helsinki, 00014, Finland

11 <sup>3</sup> Biological Physical Sciences Institute, Departments of Physics and Biology, University of York,  
12 York, YO10 5DD, United Kingdom

13

14 <sup>4</sup> These authors contributed equally

15 <sup>5</sup> Lead contact: Prof Mark Leake, Biological Physical Sciences Institute, Departments of Physics and  
16 Biology, University of York, York YO10 5DD, UK. Tel: +44 (0)1904322697. Email:  
17 mark.leake@york.ac.uk. Orcid ID: <http://orcid.org/0000-0002-1715-1249>.

18 \* Correspondence: Email: mark.leake@york.ac.uk.

19

20 **Keywords:** bacterial toxin; pore formation; single-molecule; super-resolution; immune response.

21 **ABSTRACT**

22 *Staphylococcus aureus* Panton Valentine Leukocidin (PVL) is a pore-forming toxin targeting the  
23 human C5a receptor (hC5aR), enabling this pathogen to battle the immune response by destroying  
24 phagocytes through targeted lysis. The mechanisms that contribute to rapid cell lysis are largely  
25 unexplored. Here we show that cell lysis may be enabled by a process of toxins targeting receptor  
26 clusters and receptor ‘recycling’ which allows multiple toxin pores to be formed close together. Using  
27 live cell single-molecule super-resolution imaging, Förster resonance energy transfer (FRET) and  
28 nanoscale total internal reflection fluorescence (TIRF) colocalization microscopy we visualized toxin  
29 pore formation in the presence of its natural docking ligand. We demonstrate disassociation of hC5aR  
30 from toxin complexes and simultaneous binding of new ligands. This effect may free mobile receptors  
31 to amplify hyper inflammatory reactions in early stages of microbial infections and have implications  
32 for several other similar bi-component toxins and the design of new antibiotics.

33

34

35

36

37

## 38 INTRODUCTION

39 *S. aureus* causes diseases ranging from superficial skin and soft tissue infections (SSTI) to severe  
40 invasive diseases like osteomyelitis and necrotizing pneumonia (1). During the 1960s, methicillin-  
41 resistant *Staphylococcus aureus* (MRSA) was identified as a nosocomial pathogen (2). In the 1990s,  
42 infection of previously healthy community-dwelling individuals with MRSA was reported (3). Since  
43 then, these community-associated (CA-) MRSA have rapidly emerged worldwide (4). Variants have  
44 also recently been identified which have reduced susceptibility to the antibiotic vancomycin (5) as well  
45 as complete resistance, so-called VRSA (6), and these forms of *S. aureus* pose a significant threat to  
46 human health. *S. aureus* and resistant variants have also evolved adaptations to evade attack from cells  
47 of the human immune system. However, the molecular processes which underlie these strategies are  
48 underexplored in living cells. There are compelling scientific and societal motivations to understand the  
49 mechanisms involved in immunogenic evasion strategies of *S. aureus*.

50 In the early 1930s, Pantan and Valentine described a powerful leukocidal toxin produced by  
51 multiple *S. aureus* isolates, now denoted Pantan-Valentine Leukocidin (PVL), years later shown to be  
52 cytotoxic to neutrophils, monocytes and macrophages but not to lymphocytes (7, 8). The majority of  
53 CA-MRSA isolates carry the genes encoding PVL, partially due to the successful spread of the PVL  
54 carrying clone USA300 in the USA (3, 4, 9, 10), rarely present in hospital-acquired antimicrobial  
55 resistant MRSA and methicillin susceptible *S. aureus* isolates. Based on epidemiological studies, PVL  
56 is associated with primary skin infections in humans, osteomyelitis and, in particular, severe  
57 necrotizing pneumonia (11, 12). Necrotizing pneumonia is a severe complication caused by bacterial  
58 lung infection. It is characterized by massive recruitment of neutrophils in the site of infection, diffuse  
59 pulmonary inflammation, septic shock, and respiratory failure. Both host factors and microbial

60 virulence factors are thought to play an important role in the inflammation, however, it is unknown  
61 how the interplay between these two factors affects the severity of the disease (13).

62 PVL is a pro-phage encoded bi-component,  $\beta$ -barrel pore-forming toxin ( $\beta$ -PFT) comprising protein  
63 subunits LukS and LukF. LukS binding to the surface of target cells induces secondary LukF binding;  
64 chemical and genetic analysis suggests that the resulting complex consists of a lytic pore-forming  
65 hetero-octamer (14, 15). Stoichiometric analysis *in vitro* of this complex suggests it is an octamer of 4-  
66 plus-4 subunits (16). In this complex only LukS is known to interact with the human C5a receptor  
67 (hC5aR, CD88), a G-protein coupled seven-transmembrane receptor (GPCR). LukS targets at least the  
68 extracellular N-terminus of hC5aR (17, 18), similar to the chemotaxis inhibitory protein of *S. aureus*  
69 (CHIPS), but may also interact with the transmembrane receptor region (19). C5aR is the ligand for  
70 C5a, a powerful anaphylatoxin released during complement activation. Complement is a powerful first  
71 line defense mechanism against invading pathogens which can be initiated through three pathways: the  
72 classical, lectin, or alternative pathway. Activation of any of the three pathways on the target leads to a  
73 rapid opsonization with C3b (20). Further activation of complement leads to initiation of the terminal  
74 pathway with release of C5a and formation of membrane attack complexes that are lytic for Gram-  
75 negative but not Gram-positive bacteria (21, 22). Therefore, in defense against Gram-positive bacteria  
76 C3b-opsonization together with attraction and activation of neutrophils via C5a-C5aR interaction are  
77 essential (23, 24). In severe cases, formation of C5a can potentially lead to hyper activation of the  
78 inflammatory response, an inability to regulate this potentially fatal reaction and eventually harm the  
79 human host tissues. Because of this strong pro-inflammatory activity, therapeutic interventions have  
80 recently focused on neutralizing antibodies against C5a and C5aR as potential candidates for the  
81 treatment of severe inflammatory conditions such as bacterial induced sepsis (25, 26).

82 LukS binding to hC5aR inhibits C5a receptor binding which efficiently blocks neutrophil  
83 activation (17). LukS receptor binding alone is not sufficient for cell lysis but requires simultaneous  
84 interaction between the leukocidin subunits and hC5aR. However, multiple possible subunit and  
85 receptor combinations are theoretically possible and the spatiotemporal dynamics in functional  
86 complexes in live cells between LukS, LukF and hC5aR is not yet known. In addition to PVL *S. aureus*  
87 can produce a number of other  $\beta$ -PFTs with varying receptor and cell type specificities. From these  
88 LukED, LukAB (or LukGH) and  $\gamma$ -hemolysin (composed of two compound pairs, HlgA/HlgB or  
89 HlgC/HlgB) are classified as bi-component toxins like PVL while  $\alpha$ -hemolysin is the prototypical  $\beta$ -  
90 PFT that assembles into a pore through the oligomerization of seven monomeric polypeptides (27).

91 Next to bacterial toxins, an entire group of other pore forming proteins have been identified  
92 which are involved in human innate immunity, indicating that pore-forming proteins are employed in  
93 survival strategies for several types of organisms (28). Development of methods to study dynamic  
94 processes of pore formation by these toxins at a molecular level may improve our understanding of the  
95 evolution of bacterial virulence and human immunity. There are several studies that have attempted to  
96 explain the function of bacterial PFTs, including structural and subunit stoichiometry data from high  
97 resolution X-ray crystallography and single-molecule fluorescence microscopy (16, 29, 30). However,  
98 these studies focused on pathogen instead of host factors and were thereby limited in excluding the  
99 specific interaction between host cell receptor and bacterial toxin component, the first step required for  
100 toxin oligomerization on the host cell membrane and the presence of the most potent factor mediating  
101 the inflammatory response via C5a recognition in the site of infection (17).

102 Here, we used single-molecule fluorescence detection with super-resolution localization  
103 microscopy (31) to determine protein complex assembly on receptors in live and fixed cell membranes.  
104 We studied human embryonic kidney (HEK) cells modified to express monomeric Green Fluorescent

105 Protein (mGFP) labeled hC5aR, exposed to Alexa dye-labeled *S. aureus* toxin components LukS and  
106 LukF and imaged using total internal reflection fluorescence (TIRF) real time microscopy (Figure 2-  
107 figure supplement 1a) allowing us to monitor the spatiotemporal dynamics of receptor and toxin  
108 molecules in the cell membrane. Our findings indicate that LukS binds on clusters of membrane-  
109 integrated hC5aRs. The receptor-bound LukS then binds LukF leading to the formation of a pore that is  
110 consistent with previous stoichiometric studies. However, when LukF is bound to the complex, we  
111 observe fewer colocalized hC5aRs with toxin in fixed cells, more immobilized toxin complexes in live  
112 cells and a significantly reduced Förster resonance energy transfer (FRET) signal, indicating,  
113 unexpectedly, that pore formation leads to simultaneous dissociation of the receptors from the complex.  
114 In addition, our biochemical data suggests that the dissociated receptor can then be available for  
115 additional LukS molecules or the C5a generated during complement activation as a response to LukSF  
116 mediated cell lysis. This new finding suggests that a limited number of receptors can be ‘recycled’ as  
117 docking for further toxin. This ensures that a sufficient number of pores will damage nearby  
118 phagocytic cells, particularly important when high numbers of C5a anaphylatoxin are blocking LukS,  
119 and potentially also enables simultaneous C5a mediated inflammatory response on adjacent cells.

120

121 **RESULTS**

122 **Maleimide-labeled LukSF mediates toxicity on human polymorphonuclear (PMN) and HEK**

123 **cells.** To study LukSF pore formation on live cells using single-molecule fluorescence microscopy,  
124 single cysteine substitutions on the exposed surface of the cap domain of the toxin complex (Figure 2 –  
125 figure supplement 1b), K281C on LukS and K288C on LukF, were engineered to facilitate maleimide  
126 labeling of LukF and LukS. These were denoted as the modified protein mLukF or mLukS. A second  
127 substitution Y113H on LukS was chosen on the stem domain to facilitate pore formation of the LukS  
128 mutant (mLukS), based on previous studies (16). We compared the lytic activity of these mutants to  
129 their unmodified wild type equivalents by measuring PMN membrane permeabilization after 30 min  
130 toxin exposure using a DAPI fluorescent dye to measure the DNA of lysed cells by flow cytometry.  
131 DAPI does not penetrate intact cell membranes, and is therefore a good measure for cell permeability  
132 and cell death. In this assay each of the wild type toxins was replaced with the modified protein either  
133 unlabeled (mLukF or mLukS) or with a single Alexa647 dye molecule label (mLukF\* or mLukS\*)  
134 (Figure 1). All modified proteins displayed toxicity phenotypes towards PMN cells with 100% cell  
135 lysis detected at concentrations of 1-10 nM (Figure 1a), compared to wild type equivalents at ~3 nM.  
136 Similarly, both mLukF and mLukF\* displayed toxicity towards PMN cells, with the labeled toxin  
137 mLukF\* requiring closer to 30 nM concentration for complete lysis of the cells within 30 min compared  
138 to the wild type LukF(wt). Since the LukS component mediates the toxin recognition on the target cells  
139 we next studied the binding of mLukS or mLukS\* on PMNs. In this assay, mLukS was able to inhibit  
140 the interaction of FITC-labeled wild type LukS on PMN cells equally well as the maleimide-labeled  
141 mLukS\* (Figure 1b).

142

143           The LukS/LukF toxin is known to be specific towards human cells expressing human C5aR  
144 (hC5aR) such as neutrophils, monocytes and macrophages but does not lyse cells that do not express  
145 the receptor (17). To further investigate the specificity of the mutated and labeled toxins on human  
146 cells we prepared HEK cells overexpressing hC5aR, which unlike neutrophils can be easily cultured for  
147 genetic manipulation and optical imaging experiments. We used a monomeric variant of green  
148 fluorescent protein (mGFP) cloned in the C-terminal end of the receptor to report on the spatiotemporal  
149 localization of the receptor and for determining the subunit stoichiometry in observed receptor clusters.  
150 As expected, the toxins lysed only cells expressing hC5aR while the CCR2 expressing cells remained  
151 intact (Figure 1d). We did not observe any binding of mLukF\* on the same cells (Figure 1c) which is  
152 consistent with previous observations that LukF in the absence of LukS does not interact with PMN  
153 cells (15). The toxin inhibited binding of mLukS\* in a dose-dependent fashion (Figure 1e).

154           After analyzing the concentration required for efficient LukS binding and cell lysis we wanted  
155 to quantify the dynamics of cell lysis in the presence of mLukF and mLukS. Since the maleimide-  
156 labeled mLukF required up to 10-fold higher concentrations for complete lysis of HEK cells within 30  
157 min compared to PMNs, and because of the loss of molecules during washing cycles, the assay was  
158 optimized to have 20-fold excess of mLukF\* (600 nM for mLukF\*). Following pre-incubation of  
159 hC5aR-mGFP expressing cells with LukS(wt) or mLukS the second toxin component was added and  
160 the cellular uptake of DAPI was measured as before using flow cytometry. The wild type toxins  
161 LukF(wt) and LukS(wt) caused significant cell lysis (defined as >80% of all sampled cells in the  
162 population) within 10 min, while closer to 20 min was required for significant lysis by the mLukF\* and  
163 mLukS toxin combination (Figure 1f).



164 **LukS colocalizes to hC5aR then addition of LukF triggers cell lysis.** A similar analysis was  
165 performed by monitoring the lysis of live cells, sampling every 2.5 s at 50 ms exposure time per frame  
166 using total internal reflection fluorescence (TIRF) microscopy, at very low excitation intensity to  
167 prevent photobleaching and facilitate data acquisition of dynamic events involved in the formation of  
168 LukSF nanopores in cell membranes. Here, hC5aR-mGFP cells were first imaged in the absence of  
169 toxin. In the green channel we observed mGFP localization consistent with the cell membrane,  
170 manifest as relatively high apparent brightness towards the cell boundaries consistent with the cell  
171 membrane curving away from the microscope coverslip perpendicular to the TIRF excitation field.  
172 Controlled addition of mLukS\* (labeled with Alexa647) to the sample petri dish followed by washing,  
173 while imaging simultaneously throughout, resulted in colocalization of the hC5aR and mLukS (Figure  
174 2, Movie 1). Further addition of mLukF resulted in complete lysis of the cell, as defined by the  
175 observation of explosive release of membrane vesicles, after ~15 min (Figure 2, Movie 2).  
176 Colocalization of hC5aR, mLukS\* and mLukF\* (labeled with Alexa594) was also confirmed by three  
177 color experiments, imaging cells after addition of toxins and washes until the start of lysis (Figure 2).

178

179 **LukS forms tetramers and clusters hC5aR before binding LukF.** Using higher laser intensity TIRF  
180 excitation enabled rapid millisecond single channel sampling of single fluorophores faster than their  
181 molecular mobility (32), confirmed by imaging antibody-immobilized GFP and Alexa dyes (Figure 3 –  
182 figure supplement 1). Imaging live hC5aR-GFP cells in these conditions saturated the camera CCD but  
183 after 1-2 min of exposure, photobleaching was sufficient to reduce intensity and allow us to observe  
184 several distinct, mobile, circular fluorescent foci at a mean surface density of ~1 per  $\mu\text{m}^2$  in the planer  
185 membrane regions which lie parallel to the TIRF field away from the cell boundaries (Figure 3a, Movie  
186 3). We monitored the spatiotemporal dynamics of foci in the planar membrane regions using automated

187 tracking software (33) which allowed foci to be tracked for several seconds to a spatial precision of  
188 ~40 nm (34). The measured foci width (half width at half maximum determined from their pixel  
189 intensity profile) was in the range 200-300 nm, consistent with the point spread function (PSF) width of  
190 our microscope. By using step-wise photobleaching analysis we estimated stoichiometry values for all  
191 detected fluorescent foci by employing a method which quantifies the initial unbleached foci brightness  
192 and divides this by the measured brightness for the relevant single dye reporter molecule (Figure 3 –  
193 figure supplement 1) (35). These foci contained large numbers of receptors of up to ~2,500 hC5aR  
194 molecules with a mean stoichiometry of ~180 (Figure 3b, Table 1 – source data 1). Addition of mLukS  
195 and mLukF increased the mean stoichiometry by >50% consistent with the toxin causing receptor  
196 clustering.

197         Imaging mLukS\* incubated with hC5aR-GFP cells revealed distinct foci (Figure 3a, Movie 4).  
198 The probability distribution of mLukS\* stoichiometry values in live cells in the absence of mLukF is  
199 shown in Figure 3c, rendered using a kernel density estimation which generates an objective  
200 distribution that does not depend upon the size and location of subjective histogram bins (36). We  
201 measured a broad range of stoichiometry values, spanning a range from only a few LukS molecules per  
202 foci to several tens of molecules, with a mean of ~30 molecules per foci. Closer inspection of the  
203 stoichiometry values indicated an underlying periodicity to their probability distribution, which we  
204 investigated using Fourier spectral analysis (37). The resulting power spectrum (Figure 3d) indicated a  
205 fundamental peak equivalent to a stoichiometry of  $3.9 \pm 0.2$  molecules, suggesting that foci are  
206 composed of multiples of tetrameric mLukS\* complexes.

207         Fluorescent foci, if separated by less than the diffraction-limited PSF width of our microscope,  
208 are detected as a single particle but with higher apparent stoichiometry. We therefore tested the  
209 hypothesis that the observed mLukS\* foci stoichiometry distribution could be explained by the random

210 overlap of isolated mLukS\* tetramer foci. To do so we modeled the nearest-neighbor separations of  
211 individual mLukS\* tetramers in the cell membrane as a random Poisson distribution (38) and used  
212 sensible ranges of tetramer surface density based on our single particle tracking results (Figure 3 –  
213 Figure supplement 2). However, all random tetramer overlap models we explored showed poor  
214 agreement to the observed experimental stoichiometry distribution, but we found that random overlap  
215 of multimers of tetramers could account for the stoichiometry distribution well (Figure 3e). Optimized  
216 fits indicated that the random overlap of mLukS\* foci with a stoichiometry in the range ~4-20  
217 molecules were able to best account for the experimental data.

218 We tested if there was a dependence of foci stoichiometry on incubation time with leukocidin.  
219 Acquiring a time course for mLukF\* accumulation following pre-incubation of cells with mLukS was  
220 not feasible since unbound mLukF\* had to be washed from the sample to prevent a prohibitively high  
221 fluorescent background. However, we were able to acquire time courses in which mLukF was added to  
222 cells that had been pre-incubated with mLukS\*. For these, the mLukS\* foci stoichiometry distribution  
223 was measured as a function of time after mLukF addition for several different fields of view, each  
224 containing typically ~5 cells. We found that the mean hC5aR foci stoichiometry indicated no obvious  
225 correlation to mLukF incubation time (Figure 3f), however the mean mLukS\* foci stoichiometry  
226 increased with time ( $p < 0.05$ ).

227 By calculating the mean squared displacement (MSD) as a function of time interval ( $\tau$ ) for each  
228 tracked foci we could determine its microscopic diffusion coefficient ( $D$ ). The distribution of  $D$  for  
229 hC5aR and mLukS/F\* (Figure 3 – figure supplement 2) had similar low value peaks at  $\sim 0.05 \mu\text{m}^2/\text{s}$ ,  
230 consistent with immobile foci tracked with our localization precision spatial precision of 40 nm.  
231 Several mobile foci were also seen, which diffused at rates up to  $\sim 5 \mu\text{m}^2/\text{s}$ . Based on the measured  
232 width of the immobile peak width on these distributions we set a threshold of  $0.12 \mu\text{m}^2/\text{s}$  to categorize

233 foci as either immobile, which indicated a mean  $D=0.025 \pm 0.030 \mu\text{m}^2/\text{s}$  ( $\pm\text{SD}$ ), or mobile, which  
234 indicated a mean  $D=0.47 \pm 0.40 \mu\text{m}^2/\text{s}$  (Table 1 - source data 1). Plots of the measured MSD vs.  $\tau$   
235 relations for mobile foci indicated a linear dependence indicative of free Brownian (i.e. 'normal')  
236 diffusion. However, similar plots for immobile foci indicated an asymptotic dependence consistent with  
237 confined diffusion (39), whose plateau was equivalent to a confinement diameter of  $\sim 400$  nm (Figure 3  
238 – figure supplement 3). The relative proportion of mobile foci was  $\sim 35\%$  of tracked foci for hC5aR,  
239 regardless of toxin and similar for mLukS in the absence of mLukF. Addition of mLukF, caused a drop  
240 in the mobile proportion by a factor of  $\sim 3$  (Figure 3g) suggesting that LukF causes insertion of the  
241 complex and possible disassociation from the hC5aR.

242 **LukSF pores disassociate, allowing further toxin to bind hC5aR.** To determine whether the toxin  
243 remains bound to the receptor, and to quantify the relative stoichiometry of components, we imaged  
244 fixed cells, halting cell lysis, using the same two spectrally distinct green/red dyes of mGFP and  
245 Alexa647 to label receptor and toxin components, respectively, as for the live cell experiments. We  
246 imaged cells incubated with mLukS\*, followed by incubation with mLukF and mLukS+mLukF\* and  
247 observed foci (Figure 4a) with similar stoichiometries (Figure 4 – figure supplement 1, Table 1 - source  
248 data 1) to live cells but colocalized with hC5aR. Only  $<10\%$  of the toxin was detected colocalized with  
249 hC5aR but  $\sim 32\%$  of the hC5aR was found colocalized in the presence of mLukS\* dropping to  $<10\%$  in  
250 the presence of mLukF (Figure 4b). This low percentage was within our estimate of the degree of  
251 random colocalisation between the green and red fluorophores, entirely down to chance, of  $\sim 10\%$ . This  
252 suggests that in the presence of mLukF, the toxin is not colocalised with the receptor such that mLukF  
253 causes at disassociation from hC5aR. The stoichiometry values for detected green hC5aR-mGFP foci  
254 were calculated and plotted against the equivalent stoichiometry estimates for colocalized red foci of  
255 mLukS\* and mLukF\* respectively (Figure 4c and Figure 4 – figure supplement 1). In the presence of

256 mLukS\* but in the absence of mLukF, the hC5aR-mGFP foci stoichiometry showed an approximately  
257 linear dependence on number of associated mLukS\* molecules, suggesting that each colocalized  
258 mLukS\* molecule was associated on average with ~4-5 hC5aR molecules. In the presence of labeled or  
259 unlabeled mLukF no dependence was observed (Figure 4 – figure supplement 1,  $R^2 < 0$ ) consistent with  
260 random association between toxin and receptor

261 We performed FRET experiments on FITC sortase-labeled hC5aR and Cy3-labeled mLukS or  
262 mLukF, as donor and acceptor respectively, in live cells to further probe the association between toxin  
263 and receptor. A FRET signal from whole cells of ~75% efficiency was observed, dropping to ~56%  
264 when incubated with unlabeled mLukF (Figure 4d and e), as would be expected if the complex  
265 formation leads to dissociation of the toxin from the receptor. In order to examine possible FRET  
266 between hC5aR and Cy3-labeled mLukF we performed similar experiments on fixed cells. In these  
267 experiments a FRET efficiency of ~60% was observed between hC5aR and labeled mLukS dropping  
268 below 40% between hC5aR and labeled mLukF. These results are also consistent with disassociation of  
269 hC5aR from the pore, although conformational or local environment changes cannot be ruled out with  
270 FRET alone since the relatively high remaining signal might in principle also indicate remaining  
271 association or other inter or intra hC5aR-Luk interaction. The greater drop in FRET when measured  
272 with mLukF compared to mLukS might be caused by the 3-4 nm further distance of LukF from hC5aR.  
273 The collated findings taken altogether, however, from the changes in mobility, colocalization and  
274 FRET with addition of mLukF are strongly indicative of disassociation of the LukSF complex.

275

276

277

278

279 To further confirm that the LukSF complex dissociates from the target receptor we used a  
280 monoclonal PE-labeled anti-CD88 antibody to detect the increase of free hC5aR receptors on the cell  
281 membrane upon LukSF formation. When C5a or wild type LukS was incubated with the hC5aR  
282 expressing HEK cells without LukSF both ligands showed clear inhibition of anti-CD88 binding at 100  
283 nM concentrations (Figure 5a). However, when the hC5aR expressing cells were incubated with 100  
284 nM of LukS followed by incubation with increasing concentrations of wild type LukF a statistically  
285 significant increase in anti-CD88 binding was detected at a LukF concentration of 1 nM when  
286 compared to a 0 nM LukF concentration. This indicates that this was a “sublytic” concentration at  
287 which rebinding of anti-CD88 could be detected without significant cell lysis (% of lysed cells < 10%)  
288 (Figure 5b). At a 3 nM LukF concentration the proportion of dead cells increased above 10% of all  
289 measured cells.

290 Since C5a is the natural ligand for hC5aR and can outcompete binding of LukS on the receptor  
291 we next analyzed whether LukSF formation and disengagement of hC5aR would allow rebinding of  
292 C5a on the receptor. To detect C5a rebinding at higher LukF concentrations we used a G130D LukF  
293 mutant that interacts with LukS but does not cause cell lysis. Non lytic activity of this mutant in this  
294 assay was confirmed by DAPI staining that showed minimal cell lysis even at higher concentrations  
295 (9% at a 300 nM LukFG130D concentration). At a 300 nM concentration a significant increase in C5a  
296 binding was detected indicating that LukSF dissociates from hC5aR enabling simultaneous rebinding  
297 of an hC5aR interacting ligand (Figure 5c). This assay showed that C5a can potentially interact with  
298 these cells that are attacked by LukSF. Because C5a is a potent anaphylatoxin that is generated during  
299 complement activation and potentially plays a crucial role in *S. aureus* infections (41) we next analyzed  
300 whether LukSF could lead to complement activation and C5a formation in an *ex vivo* full blood assay.

301 We used soluble C5b-9 as a marker for terminal complement activation and C5a formation, not C5a,  
302 because LukS is known to compete with C5a for binding to hC5aR on neutrophils (17). The presence  
303 of 200 nM of LukSF clearly increased formation of soluble C5b-9 compared to full blood without any  
304 toxin or only LukS (Figure 5d), indicating that LukSF mediated cell lysis increases C5a formation and  
305 potentially also inflammation in the site of infection.

306

## 307 **DISCUSSION**

308 *S. aureus* toxin components LukF and LukS are encoded by two co-transcribed genes of a prophage  
309 integrated in the *S. aureus* chromosome (42). Most of the *S. aureus* clinical isolates investigated have  
310 the genes encoding  $\alpha$ -hemolysin,  $\gamma$ -hemolysin, LukAB and LukED but only 5% of those have LukSF  
311 (PVL). This ratio for PVL, however, is different among CA-MRSA isolates where 85% of the strains  
312 carry the *pvl* gene linking the toxin epidemiologically to these strains (10). The specificity to cell  
313 surface receptors makes it difficult to study PVL's role in *S. aureus* pathogenesis in a whole animal  
314 model. It is possible that lysis of neutrophils by PVL is responsible for a reduced host defense  
315 mechanisms allowing the pathogen to spread and cause eventual tissue damage. However, a previous  
316 study using a rabbit animal model on necrotizing pneumonia suggests that PVL itself directly or  
317 indirectly causes tissue injury and by this way induces local inflammation (43). Our finding that the  
318 toxin complexes are found in receptor clusters indicates that lysis of cells depends on the local density  
319 of close proximity hC5a receptors that will initiate the pore formation process by docking LukS close  
320 to the cell membrane such that four hC5aR-LukS dimers (assuming that one LukS binds one hC5aR)  
321 can interact with the free non-bound LukF that will eventually form an octamer (i.e. 4 by 4) and a  
322 functional pore with LukS. These data also suggest that when proper assembly in an octamer is

323 ongoing/complete, hC5aR will dissociate from the complex and, at the same time, interact with the C5a  
324 that is formed during complement activation amplified by LukSF-mediated cell lysis. This is logical  
325 because, in addition to invading microbes, apoptotic and necrotic cells are known to activate  
326 complement (44). The triggering of local complement activation by toxin damaged cells and the release  
327 of locally generated C5a (Figure 5) and its interaction with adjacent cells such as endothelial or lung  
328 epithelial cells (45) could explain the mechanism behind the exacerbated inflammation characteristics  
329 exhibited in necrotizing pneumonia. This is an important finding, suggesting that the cause of infection  
330 can dramatically affect the magnitude of the inflammatory response and is highly dependent on the  
331 dynamics of microbial molecules interacting with human receptors. In addition, the disengaged hC5aR  
332 is possibly available for new toxins to bind, as C5a has been shown to here, thus allowing the receptor  
333 to be recycled and reused by additional LukS molecules. Our finding that C5a can rebind indicates that  
334 the dissociated free hC5aR does not change in conformation due to previous contact with LukS and  
335 therefore would also be available for binding with LukS. We find that roughly half of LukS complexes  
336 are immobile prior to LukF binding, but that LukF binding then results in mostly immobile LukSF  
337 complexes. Speculatively, this result may suggest that LukS binds hC5aR initially and then inserts  
338 itself transiently in the membrane phospholipid bilayer via the exposed hydrophobic residues,  
339 following binding of LukF molecules to LukS. This conformation would in principle then lead to pore  
340 formation across the whole cell membrane, thus resulting in a more stable insertion of the LukSF  
341 complex into the cell membrane.

342 Human C5aR expressing cells such as human PMNs are susceptible to LukSF-mediated lysis  
343 and we show that the interaction between maleimide-labeled toxin component LukS and the cell  
344 surface receptor is required for the target recognition and cell lysis similarly as shown before for wild  
345 type LukS (17). By characterizing the mobility of hC5aR and LukS in live cells we find that roughly



346 half of hC5aR and LukS foci diffuse relatively freely in the cell membrane while the remainder, rising  
347 to > 90% of LukS when LukF is present, are confined to zones in the membrane of ~400 nm effective  
348 diameter. We cannot directly determine the cause of this confinement in our present study. However, if  
349 LukS were to undergo a conformational change following LukF binding then this may potentially  
350 expose hydrophobic residues that could then insert the toxin into the hydrophobic interior of the  
351 phospholipid bilayer; in other words, hydrophobicity-mediated anchoring. This hypothesis is  
352 strongly supported by the  $\beta$ -barrel prepore-pore formation putative mechanism of  $\gamma$ -hemolysin. Here  
353 the residues responsible for binding with the phospholipid head group are located at the bottom of the  
354 rim domain whereas the stem domain forms an antiparallel  $\beta$ -barrel of which the bottom half comprises  
355 the transmembrane portion of the pore (30). This change from receptor associated LukS to cell  
356 membrane associated LukSF complex can be seen as a change in the proportion of mobile (receptor  
357 associated LukS) and immobile (toxin complexes inserted into cell membrane) foci detected in live  
358 cells. GPCRs similarly are known to have heterogeneous mobility and lateral distribution properties in  
359 living cells at different states for example before and after activation (46).

360         Crystallographic evidence from the monomeric LukF and LukS components and the intact  $\gamma$ -  
361 hemolysin pore suggests that the pore is octameric formed from 4-plus-4 LukF/LukS subunits (29, 47,  
362 48). Our findings support this octamer model but unlike previous studies also indicate that higher  
363 stoichiometry clusters are formed on live cell membranes which have a measured periodicity of  
364 stoichiometry equivalent to 4 LukS molecules, which cannot be accounted for by random overlap of the  
365 diffraction-limited fluorescence images of individual tetrameric LukS or LukF complexes, but are  
366 explained by a model which assumes the presence of octamer clusters. Each octamer component  
367 consists of cap, rim and stem domains. Here, the cap domain contains the site for LukS/LukF  
368 interaction while the stem domain unfolds and forms the transmembrane  $\beta$ -barrel upon pore formation.

369 Within crystallization the 2-methyl-2,4-pentanediol (MPD) molecules are bound at the base of the rim  
370 domain, and recognized by Trp177 and Arg198 residues, that may participate in recognition of the  
371 phospholipid bilayer as suggested in a crystal structure of the LukF monomer (49). In contrast, the  
372 structure of the  $\gamma$ -hemolysin suggests a membrane interaction site within residues Tyr117, Phe119 and  
373 Phe139 on the same toxin component (29). The crystal structure of LukED determined recently reveals  
374 important details of the residues on LukE required for receptor identification (50). This component  
375 corresponds to the receptor binding component LukS on the LukSF complex, scanning mutagenesis  
376 indicating that LukS residues Arg73, Tyr184, Thr244, His245 and Tyr250, and to a lesser extent Tyr181,  
377 Arg242 and Tyr246, are involved in binding to the neutrophil surface (51).

378 To determine the stoichiometry of the toxin components without immobilizing the protein on a  
379 surface or within a crystal we implemented our fluorescence imaging method which allows us to  
380 monitor the actual pore formation mechanism within a living cell, including the target receptor crucial  
381 for the complex formation. This kind of study on protein complex formation has not been done before  
382 due primarily to the difficulty of labeling the components and the high native fluorescence background  
383 in mammalian cells. Our covalent labeling strategy and high excitation intensity TIRF microscopy,  
384 combined with advanced image analysis tools, opens the way for further studies into many other pore  
385 forming toxins and processes involving membrane bound protein complex formation.

386 Fourier spectral analysis combined with foci overlap modeling suggests that LukS complexes  
387 comprise a multimer of ~4-5 hC5aR subunits each of which contain 4 LukS molecules. Our findings  
388 are consistent with the hetero-octamer model of 4-plus-4 LukS/LukF subunits (16, 29, 30), but with the  
389 refinement that 4-5 hetero-octamers associate as higher order multimers in the functional cell  
390 membrane. However, our colocalization analysis also indicates the presence of stable complexes of  
391 LukS with hC5aR independent of LukF. Similarly, we observe clusters of pre-established hC5aR in

392 the absence of LukS or LukF, but the addition of LukS or LukF significantly increased the mean cluster  
393 stoichiometry. These results suggest that further binding sites for hC5aR on LukS could be possible in  
394 addition to those identified in the LukS rim domain (51). However, since the binding of LukS to  
395 neutrophils is inhibited by the C5a it is likely that LukS has only one binding site on the receptor (19).  
396 This is also supported by the similar inhibition profiles of LukS and C5a towards anti-CD88 binding on  
397 hC5aR shown in this study. Therefore, the association of LukS with approximately 4-5 hC5aR  
398 molecules could be explained by the previous suggestion that C5aR forms homo-oligomers in living  
399 cells (52). Our findings imply that LukSF assembly is dependent on hC5aR cell membrane area density  
400 as opposed to the effective hC5aR concentration when calculated over in the whole of a target cell  
401 volume, such that even when hC5aR cellular expression levels are low a cell lysis response may still be  
402 achieved through the efficient targeting of receptor clusters and recycling of the receptor molecules in  
403 the cell membrane to be re-used by free non-bound LukS to get engaged in octamer pore formation.

404 Previous *in vitro* studies on LukSF pores formed on human leukocytes and rabbit erythrocytes  
405 have found evidence for both octamers and hexamers, but importantly both suggest a LukF/LukS ratio  
406 of 1:1 (16, 53, 54). Interestingly we did not observe any correlation to the number of hC5aR present  
407 with LukF incubation time once LukF was already bound to LukS. Moreover, when LukS was  
408 incubated with LukF using sortase-labeled hC5aR cells a significant reduction was observed in the  
409 FRET efficiency signal. It is unlikely that the reduction that was observed in FRET efficiency would be  
410 due to a conformational change because the cysteine mutation used for maleimide labeling was  
411 designed to be exposed on the cap domain of LukS and LukF (Figure 2 – figure supplement 1) that in  
412 light of the structural data undergoes minimal or no conformational changes during complex assembly  
413 (30). Since our biochemical assays indicate that LukF does not bind directly to hC5aR expressing cells  
414 and, that binding of LukF to LukS results in an increased distance between the receptor and the

415 complex, this suggests that LukF binding to LukS results in LukS dissociating from the receptor,  
416 released as a newly formed LukSF complex.

417 We cannot directly determine the cause of this behavior in our present study, however one  
418 explanation may lie in the conformational change during the prepore-to-pore transition that has been  
419 shown to occur on  $\gamma$ -hemolysin complexes subsequently after binding of LukF to LukS (29, 30).  
420 Interestingly, this same study shows that during the pre-pore state the space for the transmembrane  
421 region is occupied by the rim domain of the adjacent octamer in a LukSF crystal. One explanation for  
422 these observations, that remains to be explored, is that in addition to the stem domain the residues  
423 within the rim domain that interact with the receptor might also have different orientations in the pre-  
424 pore state when compared to the pore state. The putative dissociation of the hC5aR from the LukSF  
425 complex was further verified by incubating LukS-coated hC5aR cells with increasing concentrations of  
426 LukF. Here, increase in anti-CD88 binding also clearly indicates LukSF dissociation. This kind of  
427 receptor disengagement has been shown before by at least the cytotoxin intermedilysin which interacts  
428 with a GPI-anchored complement regulatory molecule on the cell membrane (55). Moreover,  
429 dissociation of LukSF complex is also supported by electron microscopy of LukSF on human leukocyte  
430 membrane fragments. Here, the ring-shaped oligomers with outer and inner diameters of 9 nm and  
431 3 nm were shown without a receptor (54).

432 In this study we also show, for the first time to our knowledge, that the dissociated receptor can  
433 be reused by free unbound C5a. This indicates that LukS binding on the receptor does not change  
434 receptor conformation and thereby can putatively also be reused by additional LukS. In our full blood  
435 model we observed that LukSF mediated cell lysis clearly increased complement activation and C5a  
436 formation. The increase in C5a concentration in the site of infection could potentially limit the  
437 availability of hC5aR for LukS molecules on neutrophils and thereby reduce lytic activity of the toxin

438 as C5a has previously been shown to reduce LukSF mediated lysis *in vitro* (17). Rebinding of C5a on  
439 the receptor may therefore indicate that in natural settings where all components (i.e. LukS, LukF and  
440 C5a) are present C5a can outcompete binding of LukSF on the target cells. Therefore, recycling of the  
441 receptor could be one strategy for the toxin to ensure that a sufficient number of pores will damage the  
442 cells especially when limited number of receptors are available.

443         There are several steps on the leukocidin complex assembly that may be critical for the function  
444 of the toxin. Based on our observations we provide new information on leukocidin-receptor interactions  
445 and propose two additional stages to the processes of pore formation and the mechanism by which  
446 LukSF potentially induces inflammation (Figure 6). Stage 1 is the binding of LukS to hC5aR clusters.  
447 The first step in this process is the target recognition of LukS binding to the membrane receptor. The  
448 LukS-hC5aR complexes were detected on clusters of receptors indicating that pore formation takes  
449 place in these clusters. Stage 2 is the dissociation of the LukSF complex from the receptors and  
450 rebinding of free unbound ligand back to the receptor. We measured a correlation between the number  
451 of LukS and hC5aR molecules present in LukS-hC5aR complexes, but with no obvious correlation  
452 between the number of LukF and hC5aR molecules when LukF was added to the LukS-hC5aR  
453 complex. In addition to previous studies (43) we suggest that LukSF-mediated cell lysis and  
454 dissociation from hC5aR can potentially amplify *S. aureus* mediated inflammation in the site of  
455 infection (Figure 6). The direct lysis of neutrophils is enhanced by newly formed LukSF complexes  
456 that are formed on the cell membrane hC5aR via reattachment of new LukS. Neutrophil lysis activates  
457 the complement system and the newly generated C5a induces cytokine/chemokine production and  
458 neutrophil chemotaxis via the C5a/C5aR signaling pathway on adjacent cells. Furthermore, the  
459 increased vasodilation and vascular permeability leads to massive neutrophil accumulation and tissue  
460 injury at the site of bacterial infection (56).

461 In summary, our findings that the receptors of targeted host cells dissociate rapidly from the  
462 leukocidin complex upon formation of a harmful toxin pore, freeing up mobile receptor ‘seeds’ that can  
463 diffuse to other parts of the cell membrane, suggest a hitherto undiscovered strategy used by microbes  
464 to kill human immune cells that enables a limited number of receptors to be recycled as docking for the  
465 leukocidin or potentially the anaphylatoxin C5a to ensure that enough pores will form to damage the  
466 host cell and simultaneously maintain or possibly amplify the inflammation in the site of infection. This  
467 discovery may generalize to other bi-component toxins which employ a similar docking receptor like  
468 the C5aR receptor, including the family of *Staphylococcal* bi-component leukocidins of HlgC/HlgB,  
469 HlgA/HlgB, LukE/LukD (CXCR1, CXCR2, CCR5), and LukM/LukF' for bovine CCR2. These results  
470 highlight the importance of leukocidin-receptor interactions in pore formation and may facilitate further  
471 understanding in the role of pore-forming toxins in *S. aureus* infections. This new mechanistic insight  
472 may prove valuable to the development of future antibacterial and anti-inflammatory therapies,  
473 especially important in light of the growing menace of global antimicrobial resistance.

474

## 475 MATERIALS AND METHODS

### 476 Experimental model and subject details

477 ***PMN isolation, Cell Lines, and Transfections.*** Human blood was obtained from healthy volunteers  
478 and the polymorphonuclear (PMN) cells were isolated by Ficoll/Histopaque centrifugation (57).  
479 Informed consent was obtained from all subjects, in accordance with the Declaration of Helsinki and  
480 the Medical Ethics Committee of the University Medical Center Utrecht (METC-protocol 07-125/C  
481 approved 1 March 2010). A fusion construct of hC5aR with the monomeric GFP variant mGFP with  
482 A206K mutation (also denoted GFPmut3) (58) was made at the C-terminus (primers used listed in  
483 Table 2 - source data 2) or a sortase A LPXTGG sequence was made in the N-terminus and cloned into  
484 pIRESpuro vectors (Table 2 - source data 2) by PCR. The amplification reaction was performed in  
485 three separate amplification steps using overlap extension PCR on hC5aR and mGFP templates. hC5aR  
486 (Accession number of human C5aR = NM\_00173) was used as the template using enzymes and  
487 purification kits as described above. The clones were ligated into the vectors and transferred into  
488 TOP10 *E. coli* competent cells, then amplified and sequenced similarly to the toxin clones described  
489 previously. The pIRESpuro/hC5aR-mGFP vector was transfected into Human Embryonic Kidney  
490 (HEK) 293T cells (a HEK cell line, Invitrogen), stably expressing G protein G $\alpha$ 16, using  
491 Lipofectamine-2000 Reagent according to manufacturer's instructions (Thermo Fisher Scientific).  
492 After 24–48 hr, transfected cells were harvested with 0.05% trypsin. To obtain a uniform, stable  
493 culture, cells were sub-cloned in a concentration of 0.5 cells/well in a 96-well plate in Dulbecco's  
494 modified Eagle's medium (DMEM, Lonza) supplemented with 10% fetal calf serum (Invitrogen) 100  
495 U/ml penicillin/ 100  $\mu$ g/ml streptomycin (PS; Invitrogen), 1  $\mu$ g/ml Hygromycin and 250  $\mu$ g/ml  
496 Puromycin. For N-terminal labelling of the sortase A recognition sequence containing HEK cells with  
497 FITC were successfully performed in two steps as described previously (59). The expression of hC5aR

498 was analyzed by incubating the cells in 50  $\mu$ l RPMI (Invitrogen) supplemented with 0.05% human  
499 serum albumin (Sanquin), RPMI-HSA, at  $5 \times 10^6$  cell/ml concentration for 45 min with PE-conjugated  
500 anti-CD88 and detected by flow cytometry. The presence of mGFP or FITC-LPXTG was detected  
501 directly by flow cytometry.

502 ***Recombinant Protein Production and Purification.*** Polyhistidine-tagged LukS and LukF were cloned  
503 and expressed using an *E. coli* expression system. For maleimide-based labeling a single-cysteine  
504 mutation was designed to the LukS and LukF components based on previous data and the crystal  
505 structure of the octameric pore (29). An additional mutation Y113H was included in LukS to facilitate  
506 oligomerization of the maleimide-labeled protein (16). The target genes were amplified by PCR (Table  
507 2 - source data 2) from the wild type sequences using Phusion High-Fidelity DNA polymerase (Thermo  
508 Scientific) (17). The PCR product was cloned into a slightly modified pRSET expression vector  
509 (Invitrogen), resulting in expression of proteins with an N-terminal 6xHIS-tag. For LukF mutant  
510 G130D we used a gBlock (custom dsDNA sequence via Integrated DNA Technologies) to incorporate  
511 the LukF in the pRSET vector. Clones were sequenced to verify the correct sequence. The recombinant  
512 proteins were expressed in Rosetta Gami (DE3) pLysS *E. coli* using 1mM IPTG induction and isolated  
513 by a native isolation method. The expressed proteins were purified according to the manufacturer's  
514 instructions (Invitrogen) using 1 ml Nickel HisTrap and Superdex 75 HiLoad columns (GE Health Care  
515 Life Sciences). Toxin components were labeled with either Cy3 (GE Healthcare), Alexa Fluor® 594 or  
516 Alexa Fluor® 647 C<sub>2</sub> Maleimide reagent according to the manufacturer's instructions (Thermo  
517 Scientific) resulting in negligible unlabeled content. The labeling efficiency was 100% as determined  
518 by protein concentrations using absorption at A280 and dye concentrations using absorption at A650 by  
519 a Nanodrop ND-1000 Spectrophotometer.

520



521 **Method details**

522 **Binding Assays.** Binding of the maleimide-labeled proteins to PMN and HEK cells was confirmed by  
523 flow cytometry. LukS-K281C-Y113H (mLukS) or wild type, LukS (wt) was labeled with FITC or  
524 Alexa Fluor maleimide 647 or 594. For competition assays 3  $\mu\text{g/ml}$  of the labeled protein and  
525 increasing concentration of non-labeled mLukS or LukS(wt) was incubated with isolated PMNs or  
526 HEK hC5aR-mGFP cells ( $5 \times 10^6$  cell/ml) in a total volume of 50  $\mu\text{l}$  RPMI-HSA on ice. For binding  
527 assays without competition the cells were incubated with increasing concentration of mLukF\*. After  
528 30 min incubation on ice, cells were washed, fixed with 1% paraformaldehyde and analyzed by flow  
529 cytometry. HEK cells transfected with CCR2 receptor were used as negative control for mLukS  
530 binding. To see inhibition of PE anti-CD88 (BD biosciences) binding by LukS(wt) or C5a hC5aR  
531 expressing HEK cells were first incubated with increasing concentrations of LukS or C5a for 45 min at  
532 4°C. Then 2  $\mu\text{l}$  of anti-CD88/200,000 cells was added and incubated as previously. Cells were washed  
533 once with RPMI-HSA, fixed with 1% paraformaldehyde and analyzed by flow cytometry. To detect  
534 hC5aR dissociation using sublytic concentrations of LukSF hC5aR expressing HEK cells were  
535 incubated with 100 nM of wild type LukS for 45 min at 4°C. After washing the unbound LukS sublytic  
536 concentrations of wild type LukF was added to the cells and incubated for 20 min at 37°C and 5% CO<sub>2</sub>  
537 atmosphere. Percentages of lysed vs. non lysed cells were measured by using 1  $\mu\text{g/ml}$  of DAPI in the  
538 reaction. For C5a rebinding assay 1  $\mu\text{M}$  of C5a (Sigma) was labeled with NT-647 according to  
539 manufacturer's instructions (Monolith NT™). Free label from the sample was removed by three times  
540 centrifugation through Amicon Ultra 0.5 mL centrifugal filters (Sigma). The hC5aR expressing HEK  
541 cells were incubated with 1  $\mu\text{M}$  of wild type LukS for 45 min at 4°C. After washing 20 nM of NT647-  
542 C5a and increasing concentrations of wild type LukF was added to the cells and incubated for 20 min at  
543 37°C and 5% CO<sub>2</sub> atmosphere. Cells were washed once with RPMI-HSA, fixed with 1%

544 paraformaldehyde and analyzed by flow cytometry. Percentages of lysed vs. non lysed cells were  
545 measured by using 1 µg/ml of DAPI in the reaction. *S. aureus* Ecb (extracellular complement binding  
546 protein) was used as negative control as it interacts with another cell surface receptor, CR1 (60). Flow  
547 cytometry data were analyzed using FlowJo v10 software package.

548 **Cell Permeability Assays.** Isolated PMNs or HEK hC5aR-mGFP cells ( $5 \times 10^6$  cell/ml) were exposed to  
549 labeled and unlabeled mixtures as appropriate of mLukF/mLukS recombinant proteins at equimolar  
550 concentrations in a volume of 50 µl RPMI-HSA with 1 µg/ml of DAPI. Cells were incubated for  
551 30 min at 37°C with 5% CO<sub>2</sub> and subsequently analyzed by flow cytometry. To calculate the lysis time  
552 cells were first incubated with 150 nM of mLukS for 15 min. Then 600 nM of mLukF was added and  
553 immediately subjected to flow cytometry analysis where the permeability was measured at several time  
554 points. Cell lysis was defined as intracellular staining by DAPI. HEK cells transfected with human  
555 CCR2 receptor was used as negative control for toxin-mediated lysis. Statistical differences between  
556 means of repeated experiments were calculated using two-tailed Student *t*-tests.

557 **Ex vivo complement activation assay.** To maintain complement activity the blood samples were  
558 anticoagulated with lepirudin (Refludan, Schering, Berlin, Germany). Increasing concentrations of  
559 LukSF or LukS (0 to 2000 nM) was incubated in full blood for 30 min at 37°C under continuous  
560 rotation (300 rpm). Complement activity was stopped by adding 10 mM EDTA in the suspension and  
561 the plasma was separated from the blood cells by centrifugation at  $5000 \times g$ . A 1:30 dilution of each  
562 plasma sample was analyzed by SC5b 9 Enzyme Immunoassay according to manufacturer's  
563 instructions (MicroVue SC5b 9 Plus Enzyme Immunoassay, Quidel). One *S. aureus* colony ( $1 \times 10^8$   
564 cells) was used as a positive control for SC5b-9 formation. The bacteria were grown over night on  
565 blood agar plate at 37°C 5% CO<sub>2</sub> atmosphere.

566 ***Fluorescence microscopy.*** Cells were imaged using a Nikon A1R/STORM microscope utilizing a x100  
567 NA oil immersion Nikon TIRF objective lens. We used a total internal reflection fluorescence (TIRF)  
568 microscopy module. We used laser excitation at wavelengths 488 nm (for mGFP), 561 nm (for  
569 Alexa594) and 647 nm (for Alexa647) from a commercial multi laser unit fiber-coupled into the  
570 microscope, capable of delivering maximum power outputs up to ~200 mW, with a depth of  
571 penetration in the range ~100-130 nm for the TIRF excitation evanescent field. Fluorescent images  
572 acquired on an iXon+ 512 EMCCD camera detector (Andor) at a magnification of 150nm/pixel. Green  
573 and red channel images were obtained by imaging through separate GFP or Alexa647 filter sets. For  
574 high laser excitation intensity single-molecule millisecond imaging, green channel images to determine  
575 mGFP localization were acquired continuously using 488 nm wavelength laser excitation over a period  
576 of ~5 min through a GFP filter set, then the filter set was manually switched to Alexa647 as for red  
577 channel images acquisition continuously using 647 nm wavelength laser excitation until complete  
578 photobleaching of the sample after 1-2 min. For photobleaching laser powers ranged between 15 mW  
579 (Alexa 647) to 100 mW (mGFP). For fixed cell analysis cells were either incubated first with mLukS or  
580 mLukS\*, washed and incubated with mLukF or mLukF\*, or incubated first just with mLukS\* with  
581 mLukF\* absent, then washed and fixed with 1% paraformaldehyde.

582 For fluorescence imaging the HEK cells were grown on 0.1% poly-L-lysine which coated  
583 8-well chambered cover glass slides (Ibidi) in standard growth conditions described above. To analyze  
584 the deposition of mLukS\* on live cells the cells were first imaged in PBS buffer in the absence of  
585 toxin. Here, a  $256 \times 256$  pixel area covered approximately one cell per field of view. Then the cells  
586 were incubated for 2 min with 5  $\mu$ g/ml of Alexa594 maleimide-labeled LukS in RPMI-HSA and the  
587 cells were carefully washed with PBS keeping the imaging area and focus constant. Because of the fast  
588 bleaching of the Alexa647 label a more stable Alexa594 label was used for the LukS deposition

589 imaging. The deposition of mLukS was detected for 10 min and the lysis of the cell was recorded for  
590 15 min after addition of 600 nM of unlabeled mLukF. Cells were imaged in TIRF at 50 ms per frame  
591 with the laser automatically switched between 488 nm/0.22 mW, 647 nm/3 mW and 561 nm/3 mW or  
592 488 nm/0.22 mW and 561 nm/3 mW (Figure 2).

593 **FRET experiments.** The Cy3-labeled LukS or non-labeled LukS and Cy3-labeled LukF or non-labeled  
594 LukF and controls (only FITC-labeled cells or unlabeled cells with only Cy3-labeled LukS) were  
595 incubated at 4°C for 30 min and then 10 min at 37°C, washed 2 x with RPMI-HSA and fixed as before.  
596 The cells were in PBS during imaging. FITC experiments were performed using Leica TCS SP5  
597 microscope, using a 62× oil immersion objective lens, and FRET Sensitized Emission Wizard in Leica  
598 Application Suite Advanced Fluorescence (LAS AF). Images were acquired using 488 nm and 543 nm  
599 wavelength lasers and a laser power of 27% 12.0 (A.U.) and a scan size of 512 × 512, 800 ms, 50 ms  
600 per frame, beam splitter TD 488/543/633.

601 FRET efficiency  $\epsilon$  was calculated using the donor, directly excited acceptor and donor excited  
602 acceptor intensity from n=5-10 manual regions of interest inside cells for each experiment, using the  
603 following formula (61):

$$\epsilon = \frac{\beta(B - D) - \gamma A}{A}$$

604 B = Intensity signal, donor excited acceptor

605 D = Intensity signal, donor

606 A = Intensity Signal, directly excited acceptor

607  $\beta$  = calibration for ratio of measured intensities of  $B_{\text{donor channel}}/A_{\text{donor channel}}$

608  $\gamma$  = calibration for ratio of measured intensities of  $B_{\text{acceptor channel}}/A_{\text{acceptor channel}}$

609

610 **Single-molecule imaging of live and fixed cells.** GFP and Alexa647 fluorescence micrograph time  
611 series of fixed and live cells were sampled taken at. 20 ms per frame. Green channel images were

612 acquired continuously using 488 nm wavelength laser excitation over a period of *ca.* 5 min via the GFP  
613 filter set. Then the filter set was manually switched to that for Alexa647 and red channel images were  
614 acquired continuously using 647 nm wavelength laser excitation was until complete photobleaching of  
615 the sample after 1-2 min. The step-wise single-molecule fluorescence photobleaching was analyzed  
616 both for live and fixed cells. For live cell photobleaching analysis the cells were incubated with 150 nM  
617 of labeled or unlabeled mLukS as required for *ca.* 15 min. After washing with PBS, 600 nM of labeled  
618 or unlabeled mLukF was added and the imaging was done immediately within 10-15 min. If labeled  
619 LukF was added the wells were washed with PBS before analysis. Also samples with only LukS and  
620 without toxins were analyzed. For fixed cell analysis the cells were incubated first with mLukS or  
621 mLukS\* for 30 min at +4°C in RPMI-HSA, washed with same buffer and incubated for 10 min at 37°C  
622 with mLukF or mLukF\*, or the same protocol was followed but using mLukS\* alone with mLukF\*  
623 absent. Then the cells were washed and fixed with 1% paraformaldehyde. 1M mercaptoethylamine  
624 (MEA) buffer was used for fixed cell analysis. Photobleaching of recombinant mGFP and mLukS-  
625 Alexa647 were also separately analyzed in a tunnel slide comprising two pieces of double-sided tape  
626 forming a channel sandwiched between a standard glass microscope slide and a plasma cleaned  
627 coverslip. Proteins solutions (1µg/ml) were immobilized onto the coverslip coated by anti-GFP or anti-  
628 His antibodies respectively with phosphate buffered saline washes in between.

629

630 **Quantification and statistical analysis**

631

632 ***Binding and permeability assays.*** Statistical significance between repeated ( $n > 1$ ) experiments was  
633 analyzed using two-tailed Student's *t*-tests where using a standard p-value threshold of  $< 0.05$  as  
634 indicating statistical significance. Means and standard deviations of repeated experiments are shown in  
635 error bars, unless indicated otherwise.

636 ***Image analysis.*** Basic image extraction, cropping and quantification was done using NIS-Elements  
637 microscope imaging software and Image J. More advanced foci tracking was done using bespoke  
638 software written in MATLAB (Mathworks) (33) which enabled automatic detection and localization of  
639 individual fluorescent foci to within 40 nm lateral precision (Figure 3 – figure supplement 1a). The  
640 software identifies candidate foci by a combination of pixel intensity thresholding and image  
641 transformation. The intensity centroid and characteristic intensity, defined as the sum of the pixel  
642 intensities inside a 5-pixel radius circular region of interest around the foci intensity centroid minus the  
643 local background and corrected for non-uniformity in the excitation field are determined by repeated  
644 Gaussian masking. If the signal-to-noise ratio of a foci (the intensity per pixel/background standard  
645 deviation per pixel) is greater than a pre-set threshold, nominally here set at 0.4 based on prior  
646 simulations, it is accepted and fitted with a 2D radial Gaussian function to determine its width. Foci in  
647 consecutive frames within a single PSF width, and not different in intensity or width by greater than a  
648 factor of two, are linked into the same track.

649 Foci intensity was used to quantify stoichiometry information. As foci photobleach over time  
650 during continuous laser excitation their intensity falls in a stepwise manner due to photobleaching of an  
651 integer number of fluorophore tags in each sampling time window. By quantifying the size of a single  
652 step, the characteristic intensity of a single fluorophore can be obtained and thus the stoichiometry of

653 the foci from its initial intensity. The step size is found from the periodicity in the distribution of foci  
654 intensities corroborated by the pairwise distance (PwD) distribution of these intensities and the Fourier  
655 spectrum of the PwD which contains peaks at the characteristic intensity and harmonics at multiples of  
656 this value (Figure 3- figure supplement 1d-e).

657 Here, the copy number of hC5aR-mGFP was comparatively high such that the TIRF images  
658 were initially saturated in regards to pixel intensity output. After ~20 s of photobleaching the non-  
659 saturated foci intensity values were fitted by an exponential function which characterized the rate of  
660 intensity decay, equivalent to an exponential photobleach time of ~20 s, and extrapolated back to zero  
661 time to determine the initial foci intensity (Figure 3 – figure supplement 1f). The Alexa647 dye also  
662 bleached during 647 nm wavelength laser excitation but images were not initially saturated, but also in  
663 some images which were exposed to the 488nm laser and then the 647nm laser, also bleached by the  
664 488 nm wavelength laser. In these images a fixed correction factor of 6x, determined by comparing to  
665 images exposed to the 647 nm laser first, was used. The stoichiometry of each foci was then  
666 determined as the initial intensity divided by the intensity of the appropriate single fluorescent dye tag  
667 (i.e. either mGFP or Alexa647 in this case).

668 We characterized the mobility of tracked foci by calculating their MSD as a function of time  
669 interval ( $\tau$ ). For each detected foci the MSD was calculated from the measured intensity centroid  
670  $(x(t), y(t))$  at time  $t$  assuming a foci track of  $N$  consecutive image frames at a time interval  $\tau = n\Delta t$  where  
671  $n$  is a positive integer and  $\Delta t$  is the frame integration time (here 20 ms):

$$\begin{aligned} MSD(\tau) = MSD(n\Delta t) &= \frac{1}{N-1-n} \sum_{i=1}^{N-1-n} \left( (x(i\Delta t + n\Delta t) - x(i\Delta t))^2 + (y(i\Delta t + n\Delta t) - y(i\Delta t))^2 \right) \\ &= 4D\tau + 4\sigma^2 \end{aligned}$$

672

673 The lateral ( $xy$ ) localization precision is given by  $\sigma$  which we determine to be 40 nm. We fitted a  
674 straight line to each separate MSD relation. Assuming a line fit has an optimized gradient  $g$  to the first  
675 4 points (defined as the first we 3 measured MSD data points for  $n=1, 2$  and  $3$ , in addition to a 4<sup>th</sup> data  
676 corresponding to  $n=0$  obtained from constraining the intercept be  $4\sigma^2$  to within measurement error of  
677 the localization precision) then estimated the microscopic diffusion coefficient  $D$  as  $g/4.\Delta t$ . For  
678 immobile foci, tracks were collated and compiled to generate a mean MSD vs.  $\tau$  relation which was  
679 fitted to an asymptotic rising exponential function as an analytical model for confined diffusion of  
680 MSD plateau equal to  $L^2/6$  where  $L$  is the effective confinement diameter (39), enabling us to estimate  
681 the confinement diameter.

682 **Colocalization analysis.** The extent of colocalization between red and green detected foci was  
683 determined using a method which calculated the overlap integral between each green and red foci pair,  
684 whose centroids were within  $\sim 1$  PSF width ( $\sim 3$  pixels). Assuming two normalized, two-dimensional  
685 Gaussian intensity distributions  $g_1$  and  $g_2$ , for green and red foci respectively, centred around  $(x_1, y_1)$   
686 with sigma width  $\sigma_1$ , and around  $(x_2, y_2)$  with width  $\sigma_2$ , the overlap integral  $v$  is analytically determined  
687 as:

$$v = e^{(-\Delta r^2/2(\sigma_1^2 + \sigma_2^2))}$$

688

689 Where:

$$\Delta r^2 = (x_1 - x_2)^2 + (y_1 - y_2)^2$$

690



691

692 We use a criterion of an overlap integral of 0.75 or above to indicate putative colocalization  
693 (38) since this corresponds to a foci centroid separation equivalent to the localization precision in this  
694 case. By quantifying the standard deviation on the number of detected foci in each channel we estimate  
695 that the standard error of colocalisation proportion under our typical imaging conditions is  
696 approximately 9%.

697 ***Random foci overlap models.*** We calculated the probability of foci overlap in a single color channel by  
698 first estimating a sensible range of foci surface density  $n$ . For the lower limit we used the number of  
699 foci tracks detected in a 20 image frame time window, for the upper limit we used the average  
700 measured value of the background-corrected pixel intensity value divided by the intensity of a single  
701 fluorophore (equivalent to  $\sim 1$  mLUK $S^*$  molecule per pixel). We implemented these probability  
702 estimates into a surface density model which assumed a random Poisson distribution for nearest-  
703 neighbor separation (37, 38, 40, 62-64). This model indicates that the probability that a nearest-  
704 neighbor separation is greater than  $w$  is given by  $\exp(-\pi w^2 n)$ . The probability of overlap for each  
705 density estimate (Figure 3 – figure supplement 3) was convolved with a real molecular stoichiometry  
706 distribution and a Gaussian function  $p(x)$  of stoichiometry ( $x$ ):

$$p(x) = 2\pi\sigma^2 \exp\left(-\frac{(x-n)^2}{2\sigma^2\sqrt{n}}\right)$$

707 where  $\sigma$  is the width of single fluorophore intensity distribution ( $\sim 0.7$  molecules), and  $n$  is the real  
708 molecular stoichiometry. The tetramer model assumes  $n=4$ , then all higher order stoichiometries are  
709 due to overlapping PSFs. The tetramer oligomer molecule assumed an equal number of multimerized  
710 tetramers up to 5, which gave the best fit to the data.

711 The same strategy was used to model the random overlap probability for green and red color  
712 channel fluorescent foci in dual color imaging experiments to assess the extent of apparent  
713 colocalization due to random overlap between hC5aR and mLukS\*/F\*. The probability that a nearest-  
714 neighbor separation is greater than  $w$  for foci of two different types is the same as a single type  
715 multiplied by  $2/3$ . (38)

716

### 717 **Statistical tests and replicates**

718 All statistical tests used are two-tailed unless stated otherwise. For single-molecule TIRF imaging each  
719 cell can be defined as a biological replicate sampled from the cell population. We chose sample sizes of  
720 5-7 cells yielding thousands of foci, generating reasonable estimates for stoichiometry and diffusion  
721 coefficient distributions. Technical replicates are not possible with the irreversible photobleaching  
722 assay.

723

### 724 **Ethics statement**

725 Human polymorphonuclear (PMN) cells, obtained from healthy volunteers were isolated by  
726 Ficoll/Histopaque centrifugation (57). Informed written consent was obtained from all subjects, in  
727 accordance with the Declaration of Helsinki and the Medical Ethics Committee of the University  
728 Medical Center Utrecht (METC-protocol 07-125/C approved 1 March 2010).

729

730

731 **Acknowledgments**

732 We thank Piet Aerts and Angelino Tromp for assistance in sample preparation and labeling and Esther  
733 van 't Veld and Richard Wubbolts (Utrecht) for assistance with light microscopy and Dr Karin Strijbis  
734 (Veterinary School, UU) providing the sortase A enzyme. This work was supported by The Finnish  
735 Cultural Foundation (grants 00131060 and 00142390), the Biological Physical Sciences Institute,  
736 Royal Society, MRC (grant MR/K01580X/1), BBSRC (grant BB/N006453/1), the EPSRC Physics of  
737 Life UK network and the Wellcome Trust [ref: 204829] through the Centre for Future Health (CFH) at  
738 the University of York, UK.

739

740 **Conflict of interest**

741 All the authors declare that they have no conflict of interests.

742

743 **References**

- 744 1. DeLeo FR, Otto M, Kreiswirth BN, Chambers HF. Community-associated methicillin-resistant  
745 *Staphylococcus aureus*. *Lancet*. 2010;375(9725):1557-68.
- 746 2. Barrett FF, McGehee RF, Jr., Finland M. Methicillin-resistant *Staphylococcus aureus* at Boston  
747 City Hospital. Bacteriologic and epidemiologic observations. *N Engl J Med*. 1968;279(9):441-8.
- 748 3. Udo EE, Pearman JW, Grubb WB. Genetic analysis of community isolates of methicillin-  
749 resistant *Staphylococcus aureus* in Western Australia. *J Hosp Infect*. 1993;25(2):97-108.
- 750 4. Vandenesch F, Naimi T, Enright MC, Lina G, Nimmo GR, Heffernan H, et al. Community-  
751 acquired methicillin-resistant *Staphylococcus aureus* carrying Panton-Valentine leukocidin genes:  
752 worldwide emergence. *Emerg Infect Dis*. 2003;9(8):978-84.

- 753 5. Hiramatsu K, Aritaka N, Hanaki H, Kawasaki S, Hosoda Y, Hori S, et al. Dissemination in  
754 Japanese hospitals of strains of *Staphylococcus aureus* heterogeneously resistant to vancomycin.  
755 *Lancet*. 1997;350(9092):1670-3.
- 756 6. Koch G, Yepes A, Forstner KU, Wermser C, Stengel ST, Modamio J, et al. Evolution of  
757 resistance to a last-resort antibiotic in *Staphylococcus aureus* via bacterial competition. *Cell*.  
758 2014;158(5):1060-71.
- 759 7. Meyer F, Girardot R, Piemont Y, Prevost G, Colin DA. Analysis of the specificity of Panton-  
760 Valentine leucocidin and gamma-hemolysin F component binding. *Infect Immun*. 2009;77(1):266-73.
- 761 8. Gauduchon V, Werner S, Prevost G, Monteil H, Colin DA. Flow cytometric determination of  
762 Panton-Valentine leucocidin S component binding. *Infect Immun*. 2001;69(4):2390-5.
- 763 9. Otter JA, French GL. Molecular epidemiology of community-associated meticillin-resistant  
764 *Staphylococcus aureus* in Europe. *Lancet Infect Dis*. 2010;10(4):227-39.
- 765 10. Naimi TS, LeDell KH, Como-Sabetti K, Borchardt SM, Boxrud DJ, Etienne J, et al.  
766 Comparison of community- and health care-associated methicillin-resistant *Staphylococcus aureus*  
767 infection. *JAMA*. 2003;290(22):2976-84.
- 768 11. Lina G, Piemont Y, Godail-Gamot F, Bes M, Peter MO, Gauduchon V, et al. Involvement of  
769 Panton-Valentine leukocidin-producing *Staphylococcus aureus* in primary skin infections and  
770 pneumonia. *Clin Infect Dis*. 1999;29(5):1128-32.
- 771 12. Gillet Y, Issartel B, Vanhems P, Fournet JC, Lina G, Bes M, et al. Association between  
772 *Staphylococcus aureus* strains carrying gene for Panton-Valentine leukocidin and highly lethal  
773 necrotising pneumonia in young immunocompetent patients. *Lancet*. 2002;359(9308):753-9.
- 774 13. Perret M, Badiou C, Lina G, Burbaud S, Benito Y, Bes M, et al. Cross-talk between  
775 *Staphylococcus aureus* leukocidins-intoxicated macrophages and lung epithelial cells triggers

- 776 chemokine secretion in an inflammasome-dependent manner. *Cellular microbiology*. 2012;14(7):1019-  
777 36.
- 778 14. Jayasinghe L, Bayley H. The leukocidin pore: evidence for an octamer with four LukF subunits  
779 and four LukS subunits alternating around a central axis. *Protein Sci*. 2005;14(10):2550-61.
- 780 15. Colin DA, Mazurier I, Sire S, Finck-Barbancon V. Interaction of the two components of  
781 leukocidin from *Staphylococcus aureus* with human polymorphonuclear leukocyte membranes:  
782 sequential binding and subsequent activation. *Infect Immun*. 1994;62(8):3184-8.
- 783 16. Das SK, Darshi M, Cheley S, Wallace MI, Bayley H. Membrane protein stoichiometry  
784 determined from the step-wise photobleaching of dye-labelled subunits. *Chembiochem*. 2007;8(9):994-  
785 9.
- 786 17. Spaan AN, Henry T, van Rooijen WJ, Perret M, Badiou C, Aerts PC, et al. The staphylococcal  
787 toxin Panton-Valentine Leukocidin targets human C5a receptors. *Cell host & microbe*. 2013;13(5):584-  
788 94.
- 789 18. Postma B, Kleibeuker W, Poppelier MJ, Boonstra M, Van Kessel KP, Van Strijp JA, et al.  
790 Residues 10-18 within the C5a receptor N terminus compose a binding domain for chemotaxis  
791 inhibitory protein of *Staphylococcus aureus*. *J Biol Chem*. 2005;280(3):2020-7.
- 792 19. Spaan AN, Schiepers A, de Haas CJ, van Hooijdonk DD, Badiou C, Contamin H, et al.  
793 Differential Interaction of the Staphylococcal Toxins Panton-Valentine Leukocidin and gamma-  
794 Hemolysin CB with Human C5a Receptors. *J Immunol*. 2015;195(3):1034-43.
- 795 20. Walport MJ. Complement. First of two parts. *N Engl J Med*. 2001;344(14):1058-66.
- 796 21. Fearon DT, Austen KF. Activation of the alternative complement pathway with rabbit  
797 erythrocytes by circumvention of the regulatory action of endogenous control proteins. *The Journal of*  
798 *experimental medicine*. 1977;146(1):22-33.

- 799 22. Berends ET, Mohan S, Miellel WR, Ruyken M, Rooijackers SH. Contribution of the  
800 complement Membrane Attack Complex to the bactericidal activity of human serum. *Molecular*  
801 *immunology*. 2015;65(2):328-35.
- 802 23. Easmon CS, Glynn AA. Comparison of subcutaneous and intraperitoneal staphylococcal  
803 infections in normal and complement-deficient mice. *Infection and immunity*. 1976;13(2):399-406.
- 804 24. Mullaly SC, Kubes P. The role of TLR2 in vivo following challenge with *Staphylococcus*  
805 *aureus* and prototypic ligands. *J Immunol*. 2006;177(11):8154-63.
- 806 25. Woodruff TM, Nandakumar KS, Tedesco F. Inhibiting the C5-C5a receptor axis. *Mol Immunol*.  
807 2011;48(14):1631-42.
- 808 26. Ricklin D, Lambris JD. Progress and trends in complement therapeutics. *Advances in*  
809 *experimental medicine and biology*. 2013;735:1-22.
- 810 27. DuMont AL, Torres VJ. Cell targeting by the *Staphylococcus aureus* pore-forming toxins: it's  
811 not just about lipids. *Trends Microbiol*. 2014;22(1):21-7.
- 812 28. Dal Peraro M, van der Goot FG. Pore-forming toxins: ancient, but never really out of fashion.  
813 *Nat Rev Microbiol*. 2016;14(2):77-92.
- 814 29. Yamashita K, Kawai Y, Tanaka Y, Hirano N, Kaneko J, Tomita N, et al. Crystal structure of the  
815 octameric pore of staphylococcal gamma-hemolysin reveals the beta-barrel pore formation mechanism  
816 by two components. *Proc Natl Acad Sci U S A*. 2011;108(42):17314-9.
- 817 30. Yamashita D, Sugawara T, Takeshita M, Kaneko J, Kamio Y, Tanaka I, et al. Molecular basis  
818 of transmembrane beta-barrel formation of staphylococcal pore-forming toxins. *Nat Commun*.  
819 2014;5:4897.
- 820 31. Chiu SW, Leake MC. Functioning nanomachines seen in real-time in living bacteria using  
821 single-molecule and super-resolution fluorescence imaging. *Int J Mol Sci*. 2011;12(4):2518-42.

- 822 32. Plank M, Wadhams GH, Leake MC. Millisecond timescale slimfield imaging and automated  
823 quantification of single fluorescent protein molecules for use in probing complex biological processes.  
824 *Integr Biol (Camb)*. 2009;1(10):602-12.
- 825 33. Miller H, Zhou Z, Wollman AJ, Leake MC. Superresolution imaging of single DNA molecules  
826 using stochastic photoblinking of minor groove and intercalating dyes. *Methods*. 2015;88:81-8.
- 827 34. Wollman AJ, Leake MC. Millisecond single-molecule localization microscopy combined with  
828 convolution analysis and automated image segmentation to determine protein concentrations in  
829 complexly structured, functional cells, one cell at a time. *Faraday Discuss*. 2015;184:401-24.
- 830 35. Leake MC, Chandler JH, Wadhams GH, Bai F, Berry RM, Armitage JP. Stoichiometry and  
831 turnover in single, functioning membrane protein complexes. *Nature*. 2006;443(7109):355-8.
- 832 36. Leake MC. Analytical tools for single-molecule fluorescence imaging in cellulose. *Phys Chem*  
833 *Chem Phys*. 2014;16(25):12635-47.
- 834 37. Leake MC, Greene NP, Godun RM, Granjon T, Buchanan G, Chen S, et al. Variable  
835 stoichiometry of the TatA component of the twin-arginine protein transport system observed by in vivo  
836 single-molecule imaging. *Proc Natl Acad Sci U S A*. 2008;105(40):15376-81.
- 837 38. Llorente-Garcia I, Lenn T, Erhardt H, Harriman OL, Liu LN, Robson A, et al. Single-molecule  
838 in vivo imaging of bacterial respiratory complexes indicates delocalized oxidative phosphorylation.  
839 *Biochim Biophys Acta*. 2014;1837(6):811-24.
- 840 39. Robson A, Burrage K, Leake MC. Inferring diffusion in single live cells at the single-molecule  
841 level. *Philos Trans R Soc Lond B Biol Sci*. 2013;368(1611):20120029.
- 842 40. Badrinarayanan A, Reyes-Lamothe R, Uphoff S, Leake MC, Sherratt DJ. In vivo architecture  
843 and action of bacterial structural maintenance of chromosome proteins. *Science*. 2012;338(6106):528-  
844 31.

- 845 41. von Kockritz-Blickwede M, Konrad S, Foster S, Gessner JE, Medina E. Protective role of  
846 complement C5a in an experimental model of *Staphylococcus aureus* bacteremia. *J Innate Immun.*  
847 2010;2(1):87-92.
- 848 42. Prevost G, Cribier B, Couppie P, Petiau P, Supersac G, Finck-Barbancon V, et al. Panton-  
849 Valentine leucocidin and gamma-hemolysin from *Staphylococcus aureus* ATCC 49775 are encoded by  
850 distinct genetic loci and have different biological activities. *Infect Immun.* 1995;63(10):4121-9.
- 851 43. Diep BA, Chan L, Tattevin P, Kajikawa O, Martin TR, Basuino L, et al. Polymorphonuclear  
852 leukocytes mediate *Staphylococcus aureus* Panton-Valentine leukocidin-induced lung inflammation  
853 and injury. *Proc Natl Acad Sci U S A.* 2010;107(12):5587-92.
- 854 44. Walport MJ. Complement. Second of two parts. *N Engl J Med.* 2001;344(15):1140-4.
- 855 45. Pandya PH, Wilkes DS. Complement system in lung disease. *Am J Respir Cell Mol Biol.*  
856 2014;51(4):467-73.
- 857 46. Veya L, Piguet J, Vogel H. Single Molecule Imaging Deciphers the Relation between Mobility  
858 and Signaling of a Prototypical G Protein-coupled Receptor in Living Cells. *J Biol Chem.*  
859 2015;290(46):27723-35.
- 860 47. Pedelacq JD, Maveyraud L, Prevost G, Baba-Moussa L, Gonzalez A, Courcelle E, et al. The  
861 structure of a *Staphylococcus aureus* leucocidin component (LukF-PV) reveals the fold of the water-  
862 soluble species of a family of transmembrane pore-forming toxins. *Structure.* 1999;7(3):277-87.
- 863 48. Guillet V, Roblin P, Werner S, Coraiola M, Menestrina G, Monteil H, et al. Crystal structure of  
864 leucotoxin S component: new insight into the Staphylococcal beta-barrel pore-forming toxins. *J Biol*  
865 *Chem.* 2004;279(39):41028-37.
- 866 49. Olson R, Nariya H, Yokota K, Kamio Y, Gouaux E. Crystal structure of staphylococcal LukF  
867 delineates conformational changes accompanying formation of a transmembrane channel. *Nat Struct*  
868 *Biol.* 1999;6(2):134-40.



- 869 50. Nocadello S, Minasov G, Shuvalova L, Dubrovskaya I, Sabini E, Bagnoli F, et al. Crystal  
870 structures of the components of the *Staphylococcus aureus* leukotoxin ED. *Acta Crystallogr D Struct*  
871 *Biol.* 2016;72(Pt 1):113-20.
- 872 51. Laventie BJ, Guerin F, Mourey L, Tawk MY, Jover E, Maveyraud L, et al. Residues essential  
873 for Panton-Valentine leukocidin S component binding to its cell receptor suggest both plasticity and  
874 adaptability in its interaction surface. *PLoS One.* 2014;9(3):e92094.
- 875 52. Rabiet MJ, Huet E, Boulay F. Complement component 5a receptor oligomerization and  
876 homologous receptor down-regulation. *J Biol Chem.* 2008;283(45):31038-46.
- 877 53. Miles G, Movileanu L, Bayley H. Subunit composition of a bicomponent toxin: staphylococcal  
878 leukocidin forms an octameric transmembrane pore. *Protein Sci.* 2002;11(4):894-902.
- 879 54. Sugawara N, Tomita T, Sato T, Kamio Y. Assembly of *Staphylococcus aureus* leukocidin into a  
880 pore-forming ring-shaped oligomer on human polymorphonuclear leukocytes and rabbit erythrocytes.  
881 *Biosci Biotechnol Biochem.* 1999;63(5):884-91.
- 882 55. LaChapelle S, Tweten RK, Hotze EM. Intermedilysin-receptor interactions during assembly of  
883 the pore complex: assembly intermediates increase host cell susceptibility to complement-mediated  
884 lysis. *J Biol Chem.* 2009;284(19):12719-26.
- 885 56. Guo RF, Ward PA. Role of C5a in inflammatory responses. *Annu Rev Immunol.* 2005;23:821-  
886 52.
- 887 57. Veldkamp KE, Heezius HC, Verhoef J, van Strijp JA, van Kessel KP. Modulation of neutrophil  
888 chemokine receptors by *Staphylococcus aureus* supernate. *Infect Immun.* 2000;68(10):5908-13.
- 889 58. Zacharias DA, Violin JD, Newton AC, Tsien RY. Partitioning of lipid-modified monomeric  
890 GFPs into membrane microdomains of live cells. *Science.* 2002;296(5569):913-6.

- 891 59. Hirota N, Yasuda D, Hashidate T, Yamamoto T, Yamaguchi S, Nagamune T, et al. Amino acid  
892 residues critical for endoplasmic reticulum export and trafficking of platelet-activating factor receptor.  
893 *The Journal of biological chemistry*. 2010;285(8):5931-40.
- 894 60. Amdahl H, Haapasalo K, Tan L, Meri T, Kuusela PI, van Strijp JA, et al. Staphylococcal  
895 protein Ecb impairs complement receptor-1 mediated recognition of opsonized bacteria. *PLoS One*.  
896 2017;12(3):e0172675.
- 897 61. Wouters FS, Verveer PJ, Bastiaens PI. Imaging biochemistry inside cells. *Trends Cell Biol*.  
898 2001;11(5):203-11.
- 899 62. Delalez NJ, Wadhams GH, Rosser G, Xue Q, Brown MT, Dobbie IM, et al. Signal-dependent  
900 turnover of the bacterial flagellar switch protein FliM. *Proc Natl Acad Sci U S A*. 2010;107(25):11347-  
901 51.
- 902 63. Reyes-Lamothe R, Sherratt DJ, Leake MC. Stoichiometry and architecture of active DNA  
903 replication machinery in *Escherichia coli*. *Science*. 2010;328(5977):498-501.
- 904 64. Lenn T, Leake MC, Mullineaux CW. Clustering and dynamics of cytochrome bd-I complexes  
905 in the *Escherichia coli* plasma membrane in vivo. *Mol Microbiol*. 2008;70(6):1397-407.

906

907

908 **Legends**

909 **Figure 1. Toxin functionality on PMN and HEK cells.** (A) PMN cell permeability in the presence of  
910 unlabeled LukSK281CY113H and LukFK288C (mS+mF, number of biological replicates n=2), Alexa-  
911 labeled mS\* or mF\* and wild type LukF (F(wt)) or LukS, (S(wt)) (n=1), compared to PMN cell  
912 permeability of S(wt) and F(wt), (n=3); (B) Inhibition of 3 µg/ml of FITC-labeled S(wt) (n=3) and mS\*  
913 (n=1) binding to PMN cell by mS; Permeability dose dependencies for (A) and (B) are shown with a  
914 polynomial spline fit, statistical significance indicated between low (0.3 and 0.001 nM) and high (300  
915 nM) toxin concentrations using Student's *t*-test. Error bars indicate SD. (C) Column indicating binding  
916 responses for mF\* on hC5aR cells (n=2). \*\*\* Indicates a statistically significant difference (p<0.001)  
917 between mS\* binding on HEK-hC5aR cells compared to HEK-CCR2 and mF\* binding on these cells.  
918 (D) Permeability of hC5aR transfected HEK cells using unlabelled mS and mF, and Alexa-labeled mS\*  
919 and mF\* compared to wild type S(wt) and F(wt) (n=2). (E) Inhibition of 3 µg/ml of mS\* binding by  
920 mS on HEK-hC5aR cells, (n=3). CCR2-transfected HEK cells used as negative controls for toxin  
921 binding and lysis in (C, D) n=2 or (C) one representative experiment. Dose dependency shown with  
922 polynomial spline fit. Statistical significance calculated between low (0.3 and 0.001 nM) and high  
923 (300 nM) toxin concentrations using Student's *t*-test. (F) Permeability response of hC5aR-transfected  
924 HEK cells following incubation with unlabeled mS and Alexa maleimide-labeled mF\* or wild type  
925 toxins F(wt) and S(wt) (n=3). Statistical significance calculated between 15 min and 0 min time points  
926 using Student's *t*-test. Error bars indicate SD. Percentages of mean fluorescence intensities is shown as  
927 relative to the maximum intensity in each individual experiment (B, C and E).

928

929 **Figure 2. Colocalization of LukS with hC5aR on HEK cells.** (A) (left panel) TIRF image of hC5aR-  
930 mGFP on the surface of a HEK cell before addition of toxin; (right panels) zoom-in of yellow dashed  
931 square of left panel immediately following 2 min incubation with Alexa647-labeled

932 LukSK281CY113H (mS\*-Alexa647). (B) Equivalent images of same cell of (B) after > 15 min  
933 incubation with LukFK288C (mF). (C) (upper panel) TIRF image of colocalization of Alexa594- and  
934 Alexa647-labeled mF and mS (mF\*Alexa594 and mS\*Alexa647) with hC5aR-mGFP on HEK cells;  
935 (lower panel) zoom-in of yellow-dashed square of upper panel with colocalized foci indicated (white  
936 arrow).

937

938 **Figure 2- figure supplement 1. Construction of recombinant leukocidin proteins.** (A) Schematic of  
939 TIRF imaging assay. (B) (left panel) Crystal structure of octameric pore complex of  $\gamma$ -hemolysin (PDB  
940 ID:3B07). K273/Y111 and K289 on S and F components of  $\gamma$ -hemolysin corresponds to our engineered  
941 mutations, K281C/Y113H and K288C, on LukSF marked in their equivalent places on  $\gamma$ -hemolysin;  
942 (right panel) SDS-PAGE of the unlabeled LukSK281CY113H and LukFK288C (mLukS and mLukF)  
943 and Alexa-labeled mLukS\* and mLukF\* toxin components, bands visible at locations consistent with  
944 molecular weight of 33 kDa and 34 kDa for LukS and LukF respectively.

945

946 **Figure 3. Spatiotemporal dynamics of hC5aR, LukS and LukF in live cells.** (A) Images of HEK  
947 cells treated with LukSK281CY113H (mS) and Alexa-labeled LukFK288C (mF\*) showing brightfield  
948 (left), hC5aR-GFP (middle) and mF\* (right). (B) Probability distribution for stoichiometry of hC5aR in  
949 absence and presence of Alexa-labeled mS (mS\*) and mF\*, and (C) of mS\* foci, indicating (D)  
950 tetramer periodicity from Fourier spectral analysis. (E) A random tetramer overlap model cannot  
951 account for mS\* experimental stoichiometry data ( $R^2 < 0$ ), but a tetramer-multimer model results in  
952 excellent agreement ( $R^2 = 0.85$ ). (F) hC5aR and mS\* stoichiometry as a function of incubation time.  
953 Proportion of immobile and mobile colocalized foci in the (G) presence and absence of mS and mF.  
954 Error bars show standard error of the mean from n=5-15 image subregions.

955

956

957 **Figure 3 – figure supplement 1. Fluorescent protein characterization.** A. Fluorescence micrograph  
958 of immobilized GFP and an intensity vs. time trace for one foci showing a single photobleach step.  
959 Raw data in light blue and edge-preserving Chung-Kennedy filtered data in dark blue. B. As A for  
960 LukS-Alexa647, C. LukS-Alexa647 micrograph (red) with found foci indicated as white circles. D.  
961 Intensity distribution of Alexa 647 foci intensities from whole photobleach experiment showing  
962 periodicity at ~3,500 counts on our camera detector. E. Pairwise distance distribution of intensity in D  
963 with Fourier spectrum (inset) showing peak at ~4,000 counts. F. GFP foci intensity (natural log) time  
964 traces (green) with linear fits (red).

965

966

967

968 **Figure 3 – figure supplement 2. Density of LukS spots.** A. micrograph of mLukS\* (white) with  
969 found foci (orange circles) B. Probability distribution of overlap frequency using spots in A to calculate  
970 density. C. Zoom in of mLukS micrograph. D. Probability distribution of overlap frequency using  
971 intensity in C to calculate maximum density estimate.

972

973

974 **Figure 3 – figure supplement 3. Mobility analysis.** A. The probability distribution of microscopic  
975 diffusion coefficient showing the threshold for immobility as black dotted line and B. the mean squared  
976 displacement against time interval for mobile (upper) and immobile (lower) of hC5aR. C. and D.  
977 similar for mLukS/F\*.

978

979 **Figure 4. Relative stoichiometry of hC5aR, LukS and LukF in fixed cells.** (A) Micrographs of fixed  
980 hC5aR-GFP HEK cells treated with LukSK281CY113H (mS) and LukFK288C (mF) showing hC5aR-  
981 GFP (left) and Alexa647 (middle) and merge (right) on Alexa-labeled mS (mS\*) above and mF (mF\*)  
982 below (B) Proportion of foci colocalized and not colocalized, treated with mS, mS\*+mF and mS+mF\*  
983 for hC5aR (green) and mLuk\* (orange). Error bars show standard error of the mean from n=4 image  
984 subregions. (C) Heatmap of correlation between hC5aR and mS stoichiometry (red dash line indicates  
985 4 mS per hC5aR molecule),  $R^2 \sim 0.15$  (D) and (E) FRET images and efficiencies. The FRET  
986 experiment was performed in live and fixed sortase-tagged FITC-hC5aR expressing cells. Live cells  
987 (number of biological replicates n=2) were incubated in the presence of Cy3-labeled mS\* for 1 h at  
988 +4°C and washed, after which unlabeled mF was added. FRET was analyzed before (mS\*) or after  
989 addition of mF (mS\*+mF). FRET from fixed cells (n=3) was analyzed in the presence of mS\* or  
990 unlabeled mS and Cy3-labeled mF\* respectively (n=2). Statistical significance between cells with only  
991 mS and both of the toxin components, mS and mF, was analyzed using Student's *t*-test. Error bars  
992 indicate SD.

993  
994 **Figure 4 – figure supplement 1. Colocalization analysis.** The probability distribution of linked (A)  
995 and unlinked (B) hC5aR and similar for mLukS\* (C. and D.). E. and F. False-color heatmap scatter  
996 plots indicating that h5CaR stoichiometry is uncorrelated to mLukS or mLukF stoichiometry in the  
997 presence of mLukF.

998

999

1000 **Figure 5. LukSF dissociation and rebinding of C5a on hC5aR expressing cells.** (A) Inhibition of  
1001 anti-CD88 binding on hC5aR expressing HEK cells using increasing concentrations (horizontal axis) of

1002 wild type LukS, S(wt) and C5a. Wild type LukF, F(wt), is used as a negative control for inhibition of  
1003 anti-CD88 binding (number of biological repeats n=2). (B) Disengagement of hC5aR from LukSF was  
1004 observed as increase in PE conjugated anti-CD88 binding (right vertical axis) on S(wt) pre-coated cells  
1005 using increasing but sublytic concentrations (horizontal axis) of F(wt). Minimal cell lysis (% of lysed  
1006 cells, left vertical axis) detected in F(wt) concentrations below 3 nM (n=3). (C) Rebinding of constant  
1007 amount of NT647 labeled C5a (647-C5a) on hC5aR upon LukSF formation analyzed by incubating  
1008 S(wt) pre-coated cells with increasing concentrations (horizontal axis) of LukF mutant G130D that  
1009 associates with LukS but does not lead to cell lysis (n=2). (D) Effect of LukSF mediated cell lysis on  
1010 complement activation and C5a formation on full blood measured by using C5b-9 as a marker for  
1011 complement activation in plasma (n=3). Maximal C5a formation is observed by incubating full blood  
1012 with live *S. aureus* bacteria. Ecb (B and C), F(wt) (A) or S(wt) (D) are used as negative controls in the  
1013 assays. Percentages of mean fluorescence intensities is shown as relative to the maximal intensity in  
1014 each individual experiment (A-C). Statistical significances are calculated using Student's *t*-test. Error  
1015 bars indicate SD.

### **Figure 6. Model for LukSF-receptor binding and the mechanism of LukSF-induced**

**inflammation.** (A). LukS (PDB ID: 1T5R) binds on hC5aR (structure based on angiotensin receptor data PDB ID: 4YAY) as a soluble monomer on the cell membrane. Each LukS monomer binds one hC5aR molecule via the receptor interacting residues R73, Y184, Y250, T244 (marked with blue dots) within a cluster of approximately 4-5 hC5aR homo-oligomers. Upon binding to hC5aR LukS exposes residues for LukF (PDB ID: 1LKF) binding. In these tight clusters each LukF can bind to two LukS monomers via two interfaces. (B). Binding of LukF on LukS and formation of the octameric pore (PDB

ID: 3B07) causes dissociation of the receptors from the complex because of leakage of the cell membrane and possibly also since the receptor binding region (marked with a circle) is buried between the monomers in the complex. (C) The detached hC5aR molecule can be reused by its ligands LukS or C5a anaphylatoxin (PDB ID: 1KJS). (D) Schematic illustrating the putative mechanism of LukSF induced inflammation.

1016

1017



1018 **Movie 1.** Deposition of mLukS on hC5aR-mGFP HEK cells. The movie is shown in two clips before  
1019 (no toxin) and after addition of Alexa 595 labeled mLukS (add mLukS\*). This movie was recorded for  
1020 *ca.* 13 min and displayed here at 100x speed.

1021

1022 **Movie 2.** Lysis of hC5aR-mGFP HEK cells incubated with Alexa594 labeled mLukS\* and mLukF.  
1023 The cells were preincubated with mLukS\* and the lysis of the cells were monitored for *ca.* 13 min after  
1024 addition of mLukF (add mLukF). The red arrow points to the vesicles released during cell lysis. This  
1025 movie was recorded for *ca.* 13 min and displayed here at 100x speed.

1026

1027 **Movie 3.** Imaging live hC5aR-mGFP cells. After 1-2 min of exposure, several distinct, mobile,  
1028 circular fluorescent foci in the planer membrane regions were observed. Movie is displayed in real  
1029 time.

1030

1031 **Movie 4.** Imaging mLukS\* incubated with hC5aR-mGFP cells. Several distinct, mobile, circular  
1032 fluorescent foci were observed. Movie is displayed in real time.

1033

1034

1035

1036

1037

1038

1039

1040

1041

## Figures

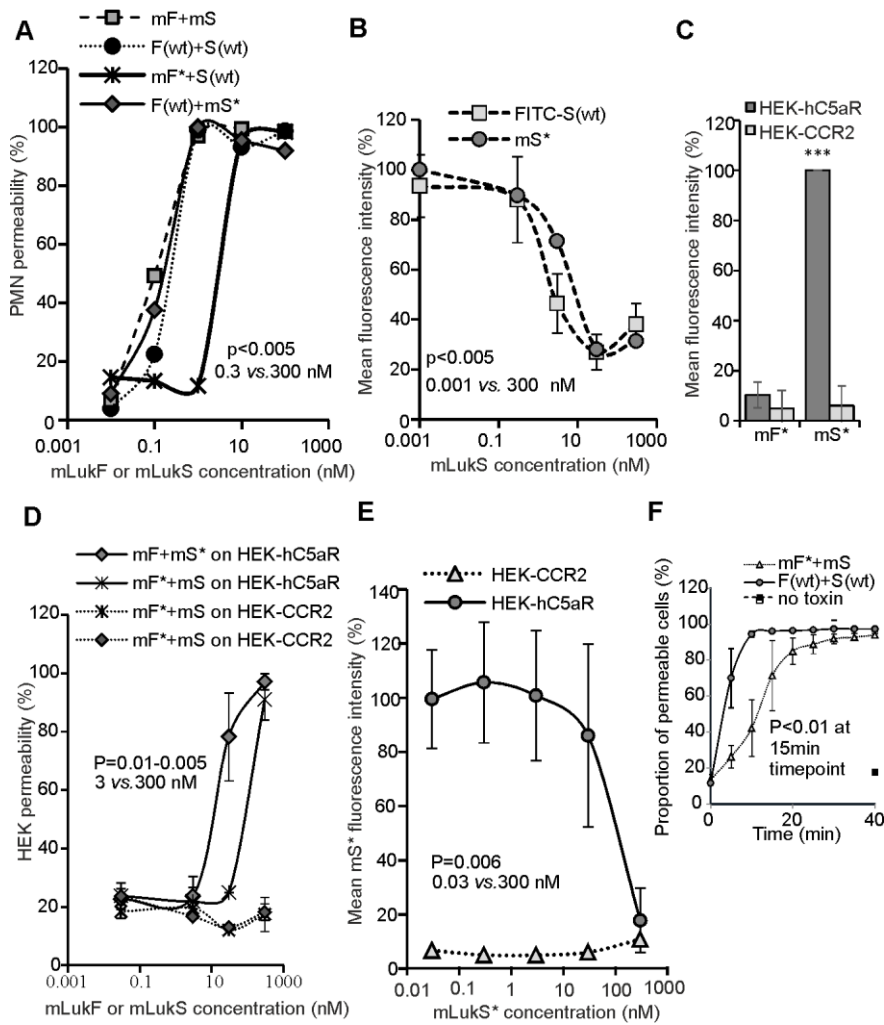

**Figure 1. Toxin functionality on PMN and HEK cells.**

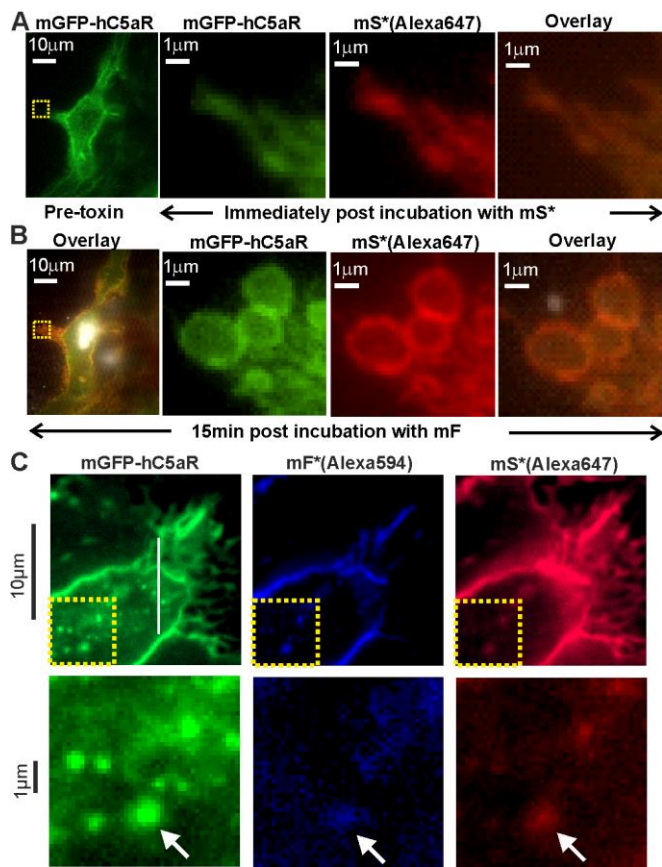

**Figure 2. Colocalization of LukS with hC5aR on HEK cells.**

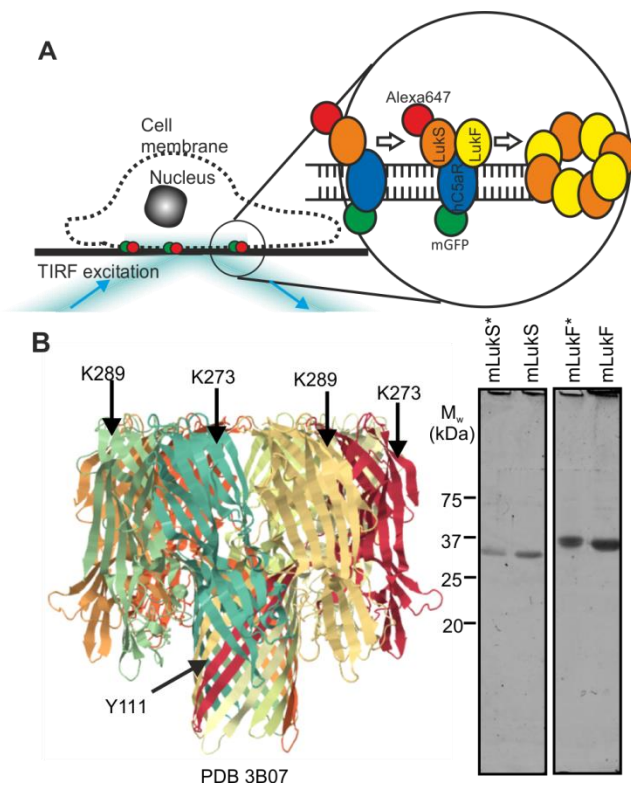

**Figure 2- figure supplement 1. Construction of recombinant leukocidin proteins.**

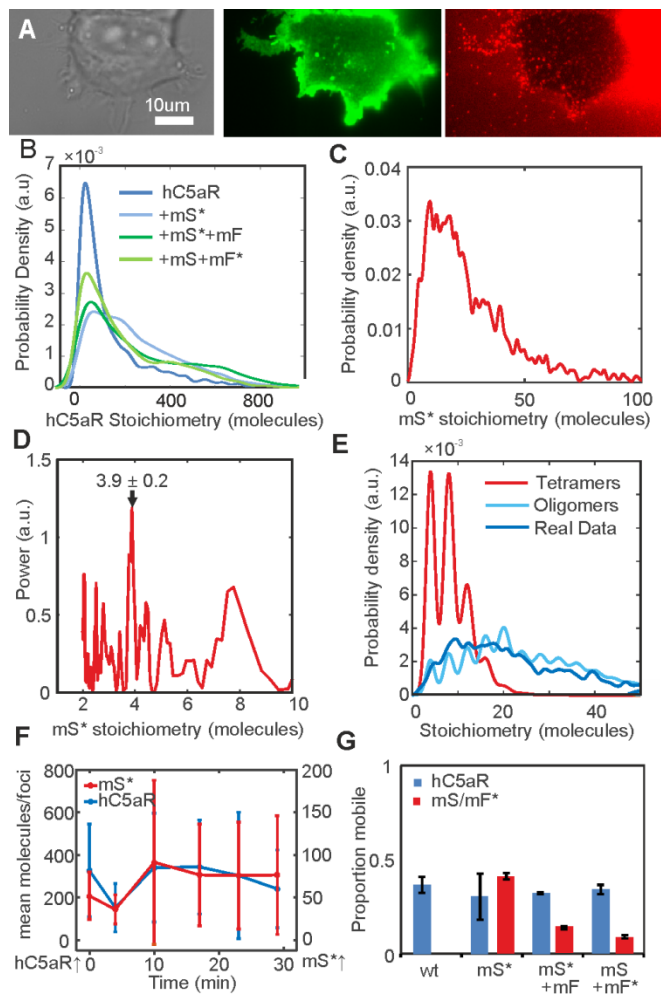

**Figure 3. Spatiotemporal dynamics of hC5aR, LukS and LukF in live cells.**

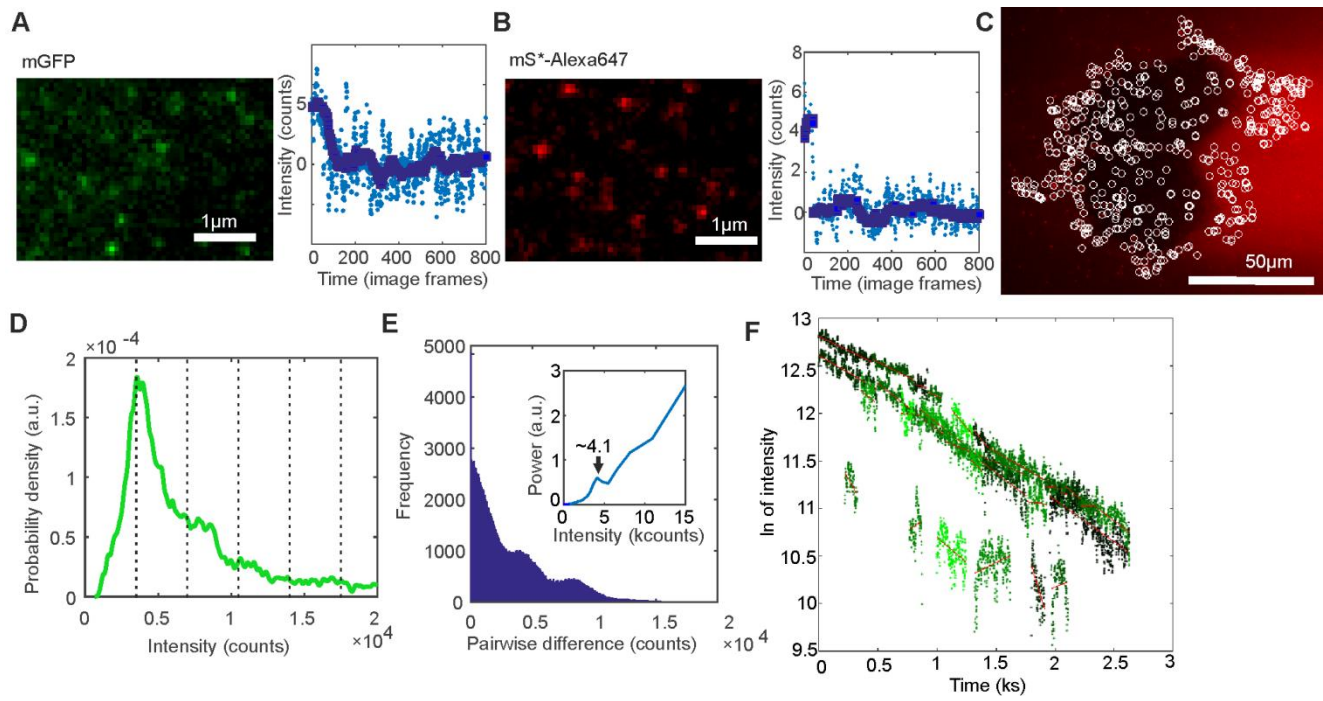

**Figure 3 – figure supplement 1. Fluorescent protein characterization.**

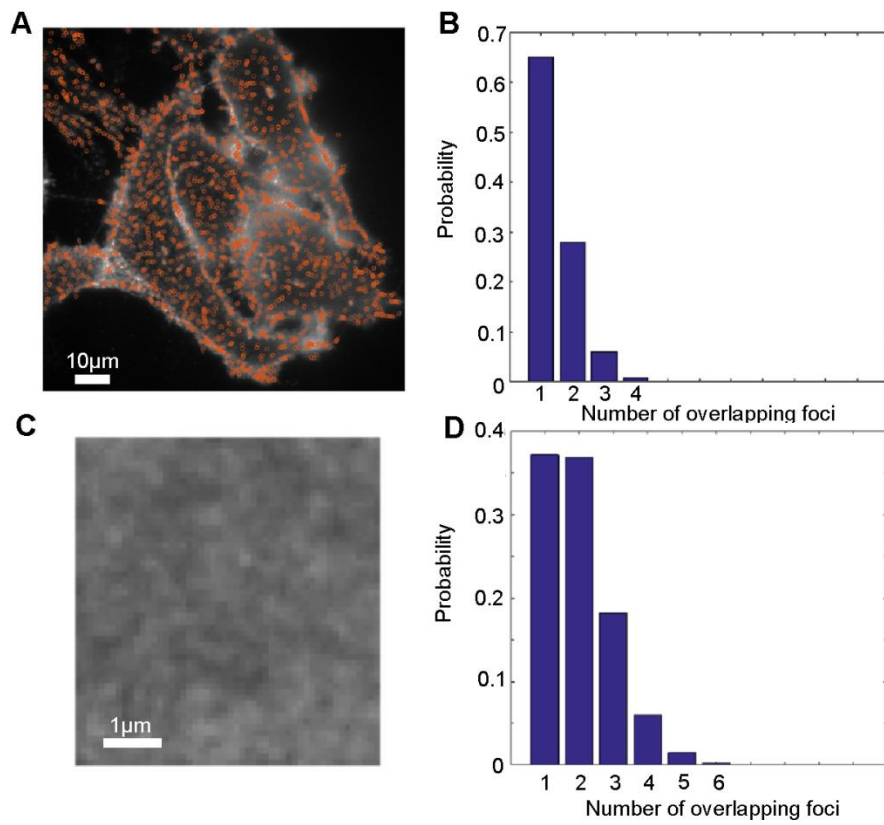

**Figure 3 – figure supplement 2. Density of LukS spots.**

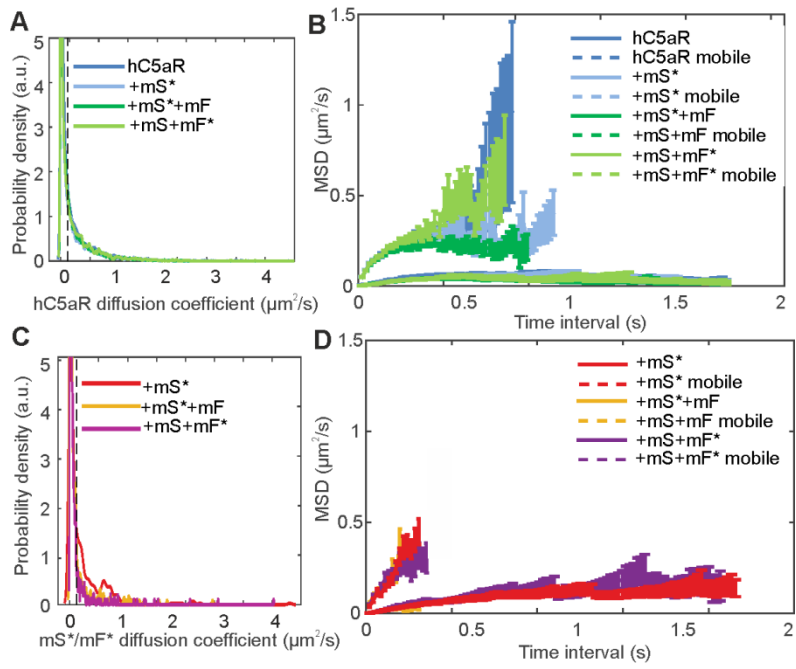

**Figure 3 – figure supplement 3. Mobility analysis.**



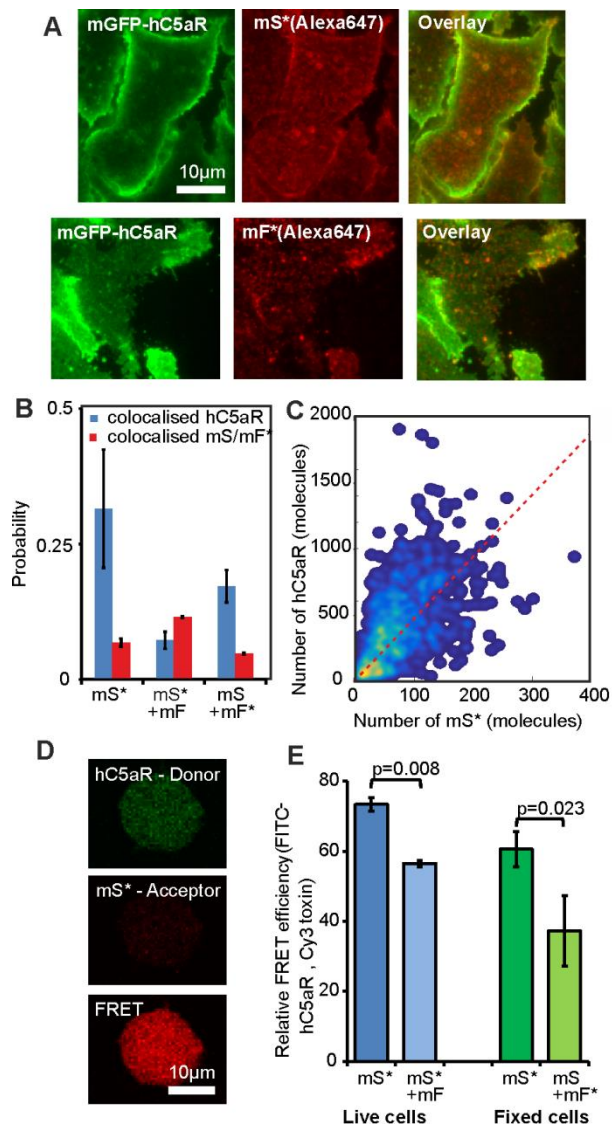

**Figure 4. Relative stoichiometry of hC5aR, LukS and LukF in fixed cells.**

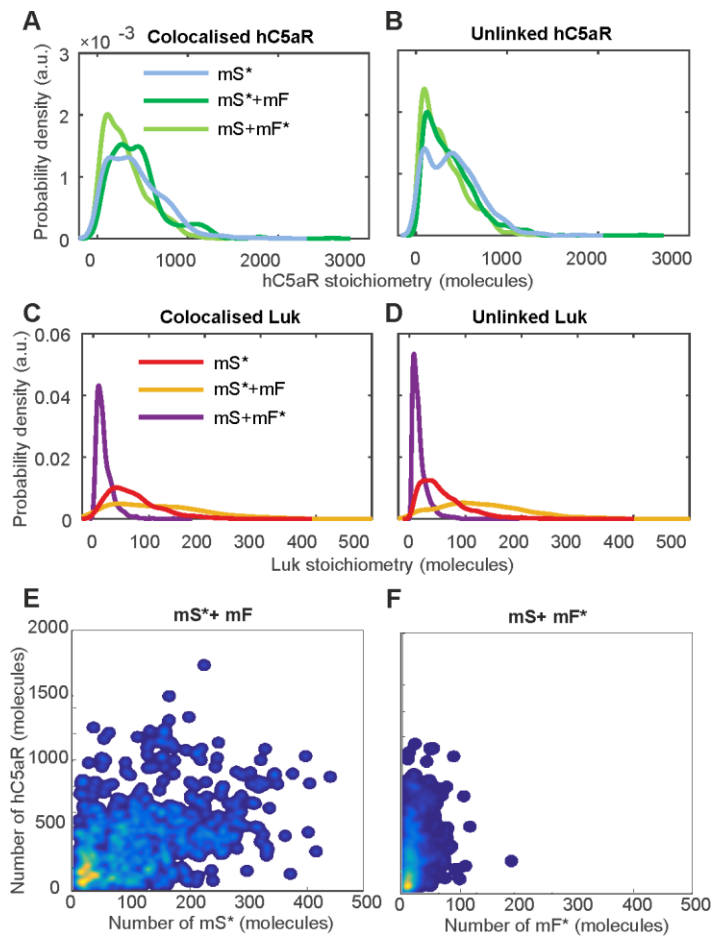

**Figure 4 – figure supplement 1. Colocalization analysis.**

1042

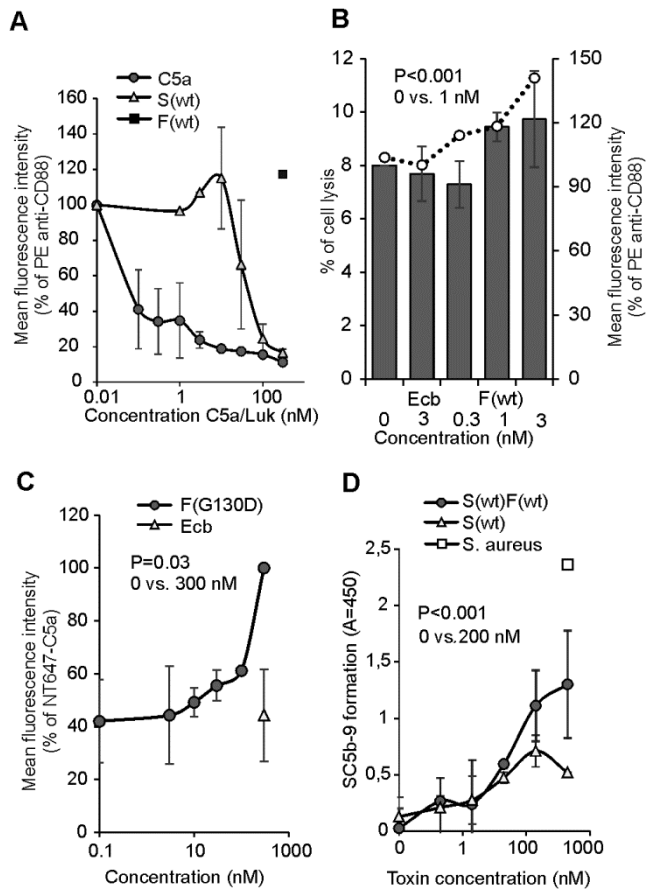

**Figure 5. LukSF dissociation and rebinding of C5a on hC5aR expressing cells.**

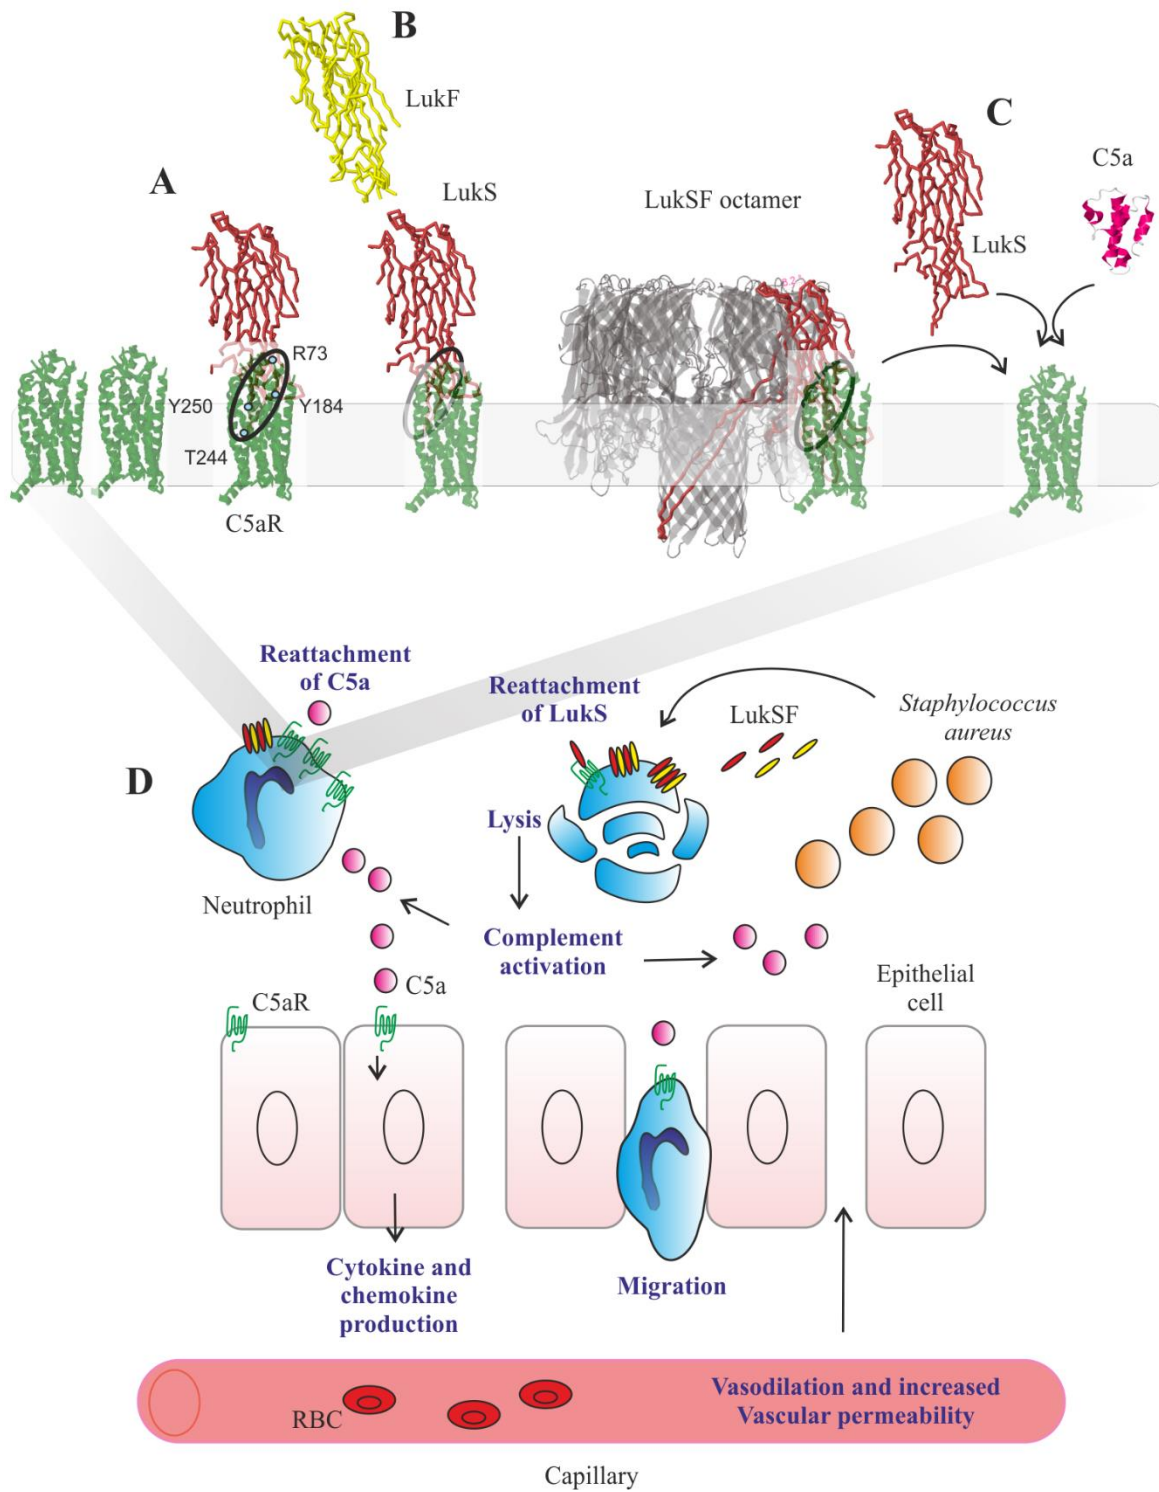

**Figure 6. Model for LukSF-receptor binding and the mechanism of LukSF-induced inflammation.**
